# Supplementary material for: Lipidomics reveals cell specific changes during pluripotent differentiation to neural and mesodermal lineages
Source: Royal Society of Chemistry journal article supplement (doi:10.1039/d4mo00261j), 2025-01-01
Supplement: d4mo00261j1.pdf [file d4mo00261j1.pdf]

## Contents of Report

Created by <https://lipidomicstandards.org>, version v2.4.0

|                                                                                      |          |
|--------------------------------------------------------------------------------------|----------|
| <b>Separation Workflow</b>                                                           | <b>1</b> |
| Overall study design . . . . .                                                       | 1        |
| Lipid extraction . . . . .                                                           | 1        |
| Analytical platform . . . . .                                                        | 1        |
| Quality control . . . . .                                                            | 1        |
| Method qualification and validation . . . . .                                        | 2        |
| Reporting . . . . .                                                                  | 2        |
| <b>Sample Descriptions</b>                                                           | <b>2</b> |
| Cell Differentiation / Human / Cells . . . . .                                       | 2        |
| <b>Lipid Class Descriptions</b>                                                      | <b>3</b> |
| 1) CAR, LPC[M+H] <sup>+</sup> / Lipid identification . . . . .                       | 3        |
| 1) CAR, LPC[M+H] <sup>+</sup> / Lipid quantification . . . . .                       | 3        |
| 2) CAR, LPC[M+Na] <sup>+</sup> / Lipid identification . . . . .                      | 4        |
| 2) CAR, LPC[M+Na] <sup>+</sup> / Lipid quantification . . . . .                      | 4        |
| 3) CAR, PC[M+H] <sup>+</sup> / Lipid identification . . . . .                        | 5        |
| 3) CAR, PC[M+H] <sup>+</sup> / Lipid quantification . . . . .                        | 5        |
| 4) CAR, PC[M+Na] <sup>+</sup> / Lipid identification . . . . .                       | 6        |
| 4) CAR, PC[M+Na] <sup>+</sup> / Lipid quantification . . . . .                       | 6        |
| 5) CAR, PC P[M+H] <sup>+</sup> / Lipid identification . . . . .                      | 7        |
| 5) CAR, PC P[M+H] <sup>+</sup> / Lipid quantification . . . . .                      | 7        |
| 6) CAR, PC P[M+Na] <sup>+</sup> / Lipid identification . . . . .                     | 8        |
| 6) CAR, PC P[M+Na] <sup>+</sup> / Lipid quantification . . . . .                     | 8        |
| 7) CAR, PC[M-H] <sup>-</sup> / Lipid identification . . . . .                        | 9        |
| 7) CAR, PC[M-H] <sup>-</sup> / Lipid quantification . . . . .                        | 9        |
| 8) CAR, PG[M-H] <sup>-</sup> / Lipid identification . . . . .                        | 10       |
| 8) CAR, PG[M-H] <sup>-</sup> / Lipid quantification . . . . .                        | 10       |
| 9) CAR, PS[M-H] <sup>-</sup> / Lipid identification . . . . .                        | 11       |
| 9) CAR, PS[M-H] <sup>-</sup> / Lipid quantification . . . . .                        | 11       |
| 10) CAR, PE[M-H] <sup>-</sup> / Lipid identification . . . . .                       | 12       |
| 10) CAR, PE[M-H] <sup>-</sup> / Lipid quantification . . . . .                       | 12       |
| 11) CAR, Cer[M+CH <sub>3</sub> COO] <sup>-</sup> / Lipid identification . . . . .    | 13       |
| 11) CAR, Cer[M+CH <sub>3</sub> COO] <sup>-</sup> / Lipid quantification . . . . .    | 13       |
| 12) CAR, Cer[M+HCOO] <sup>-</sup> / Lipid identification . . . . .                   | 14       |
| 12) CAR, Cer[M+HCOO] <sup>-</sup> / Lipid quantification . . . . .                   | 14       |
| 13) CAR, Cer[M-H] <sup>-</sup> / Lipid identification . . . . .                      | 15       |
| 13) CAR, Cer[M-H] <sup>-</sup> / Lipid quantification . . . . .                      | 15       |
| 14) CAR, FA[M-H] <sup>-</sup> / Lipid identification . . . . .                       | 16       |
| 14) CAR, FA[M-H] <sup>-</sup> / Lipid quantification . . . . .                       | 16       |
| 15) CAR, GM3[M-H] <sup>-</sup> / Lipid identification . . . . .                      | 17       |
| 15) CAR, GM3[M-H] <sup>-</sup> / Lipid quantification . . . . .                      | 17       |
| 16) CAR, HexCer[M+CH <sub>3</sub> COO] <sup>-</sup> / Lipid identification . . . . . | 18       |
| 16) CAR, HexCer[M+CH <sub>3</sub> COO] <sup>-</sup> / Lipid quantification . . . . . | 18       |
| 17) CAR, HexCer[M+HCOO] <sup>-</sup> / Lipid identification . . . . .                | 19       |
| 17) CAR, HexCer[M+HCOO] <sup>-</sup> / Lipid quantification . . . . .                | 19       |
| 18) CAR, HexCer[M-H] <sup>-</sup> / Lipid identification . . . . .                   | 20       |
| 18) CAR, HexCer[M-H] <sup>-</sup> / Lipid quantification . . . . .                   | 20       |
| 19) CAR, LPC[M+CH <sub>3</sub> COO] <sup>-</sup> / Lipid identification . . . . .    | 21       |
| 19) CAR, LPC[M+CH <sub>3</sub> COO] <sup>-</sup> / Lipid quantification . . . . .    | 21       |
| 20) CAR, LPE[M-H] <sup>-</sup> / Lipid identification . . . . .                      | 22       |
| 20) CAR, LPE[M-H] <sup>-</sup> / Lipid quantification . . . . .                      | 22       |
| 21) CAR, LPA[M-H] <sup>-</sup> / Lipid identification . . . . .                      | 23       |
| 21) CAR, LPA[M-H] <sup>-</sup> / Lipid quantification . . . . .                      | 23       |
| 22) CAR, LPG[M-H] <sup>-</sup> / Lipid identification . . . . .                      | 24       |
| 22) CAR, LPG[M-H] <sup>-</sup> / Lipid quantification . . . . .                      | 24       |
| 23) CAR, PA[M-H] <sup>-</sup> / Lipid identification . . . . .                       | 25       |
| 23) CAR, PA[M-H] <sup>-</sup> / Lipid quantification . . . . .                       | 25       |
| 24) CAR, PC P[M+CH <sub>3</sub> COO] <sup>-</sup> / Lipid identification . . . . .   | 26       |
| 24) CAR, PC P[M+CH <sub>3</sub> COO] <sup>-</sup> / Lipid quantification . . . . .   | 26       |
| 25) CAR, PC O[M+CH <sub>3</sub> COO] <sup>-</sup> / Lipid identification . . . . .   | 27       |
| 25) CAR, PC O[M+CH <sub>3</sub> COO] <sup>-</sup> / Lipid quantification . . . . .   | 27       |
| 26) CAR, PI[M-H] <sup>-</sup> / Lipid identification . . . . .                       | 28       |
| 26) CAR, PI[M-H] <sup>-</sup> / Lipid quantification . . . . .                       | 28       |
| 27) CAR, PE P[M-H] <sup>-</sup> / Lipid identification . . . . .                     | 29       |
| 27) CAR, PE P[M-H] <sup>-</sup> / Lipid quantification . . . . .                     | 29       |
| 28) CAR, PE O[M-H] <sup>-</sup> / Lipid identification . . . . .                     | 30       |
| 28) CAR, PE O[M-H] <sup>-</sup> / Lipid quantification . . . . .                     | 30       |

|                                                       |    |
|-------------------------------------------------------|----|
| 29) CAR, SM[M-H]- / Lipid identification . . . . .    | 31 |
| 29) CAR, SM[M-H]- / Lipid quantification . . . . .    | 31 |
| 30) CAR, AC[M+H]+ / Lipid identification . . . . .    | 32 |
| 30) CAR, AC[M+H]+ / Lipid quantification . . . . .    | 32 |
| 31) CAR, ANA[M+H]+ / Lipid identification . . . . .   | 32 |
| 31) CAR, ANA[M+H]+ / Lipid quantification . . . . .   | 33 |
| 32) CAR, SE[M+NH4]+ / Lipid identification . . . . .  | 33 |
| 32) CAR, SE[M+NH4]+ / Lipid quantification . . . . .  | 33 |
| 33) CAR, Cer[M+H]+ / Lipid identification . . . . .   | 34 |
| 33) CAR, Cer[M+H]+ / Lipid quantification . . . . .   | 34 |
| 34) CAR, DG[M+NH4]+ / Lipid identification . . . . .  | 35 |
| 34) CAR, DG[M+NH4]+ / Lipid quantification . . . . .  | 35 |
| 35) CAR, LPE[M+H]+ / Lipid identification . . . . .   | 36 |
| 35) CAR, LPE[M+H]+ / Lipid quantification . . . . .   | 36 |
| 36) CAR, LPE[M+Na]+ / Lipid identification . . . . .  | 37 |
| 36) CAR, LPE[M+Na]+ / Lipid quantification . . . . .  | 37 |
| 37) CAR, PC O[M+H]+ / Lipid identification . . . . .  | 38 |
| 37) CAR, PC O[M+H]+ / Lipid quantification . . . . .  | 38 |
| 38) CAR, PC O[M+Na]+ / Lipid identification . . . . . | 39 |
| 38) CAR, PC O[M+Na]+ / Lipid quantification . . . . . | 39 |
| 39) CAR, PE[M+H]+ / Lipid identification . . . . .    | 40 |
| 39) CAR, PE[M+H]+ / Lipid quantification . . . . .    | 40 |
| 40) CAR, PE[M+Na]+ / Lipid identification . . . . .   | 41 |
| 40) CAR, PE[M+Na]+ / Lipid quantification . . . . .   | 41 |
| 41) CAR, SM[M+H]+ / Lipid identification . . . . .    | 42 |
| 41) CAR, SM[M+H]+ / Lipid quantification . . . . .    | 42 |
| 42) CAR, TG[M+NH4]+ / Lipid identification . . . . .  | 43 |
| 42) CAR, TG[M+NH4]+ / Lipid quantification . . . . .  | 43 |
| 43) CAR, CL[M+H]+ / Lipid identification . . . . .    | 44 |
| 43) CAR, CL[M+H]+ / Lipid quantification . . . . .    | 44 |

## Separation Workflow

### Overall study design

|                        |                                                                                                               |                                         |                 |
|------------------------|---------------------------------------------------------------------------------------------------------------|-----------------------------------------|-----------------|
| Title of the study     | Lipidomics Reveals Cell Specific Changes During Pluripotent Differentiation to Neural and Mesodermal Lineages |                                         |                 |
| Document creation date | 12/31/2024                                                                                                    | Corresponding Email                     | erinmsb@unc.edu |
| Principal investigator | Erin Baker                                                                                                    | Is the workflow targeted or untargeted? | Untargeted      |
| Institution            | University of North Carolina at Chapel Hill                                                                   | Clinical                                | No              |

### Lipid extraction

|                   |                |                                                 |    |
|-------------------|----------------|-------------------------------------------------|----|
| Extraction method | 2-phase system | Were internal standards added prior extraction? | No |
| pH adjustment     | None           | Special conditions                              | -  |
| 2-phase system    | Folch          | Derivatization                                  | -  |

## Analytical platform

|                                                                      |                   |                                                                        |                 |
|----------------------------------------------------------------------|-------------------|------------------------------------------------------------------------|-----------------|
| Ionization additives                                                 | Ammonium acetate  | MS vendor                                                              | Agilent         |
| Number of separation dimensions                                      | Two dimensions    | Ion source                                                             | ESI             |
| Separation type 1                                                    | LC                | MS Level                                                               | MS2             |
| Separation mode 1 (liquid)                                           | RP                | Mass window for precursor ion isolation (in Da total isolation window) | 0               |
| Separation window for lipid analyte 2 selection ( $\pm$ ) in minutes |                   | Mass resolution for detected ion at MS2                                | High resolution |
| Separation type 2                                                    | IMS               | Resolution at m/z 200 at MS2                                           | 25000           |
| Separation mode 2 (generic)                                          | Drift Tube (N2)   | Mass accuracy in ppm at MS2                                            | 2               |
| Detector                                                             | Mass spectrometer | Recording mode of raw data at MS2                                      | Centroid mode   |
| MS type                                                              | QTOF              | Was/Were additional dimension/techniques used                          | Yes             |

## Quality control

|                |                                 |                   |                   |
|----------------|---------------------------------|-------------------|-------------------|
| Blanks         | Yes                             | Quality control   | Yes               |
| Type of Blanks | Extraction blank, Solvent blank | Type of QC sample | Commercial sample |

## Method qualification and validation

|                   |    |
|-------------------|----|
| Method validation | No |
|-------------------|----|

## Reporting

|                                                 |                                                                                           |                     |                                                                |
|-------------------------------------------------|-------------------------------------------------------------------------------------------|---------------------|----------------------------------------------------------------|
| Are reported raw data uploaded into repository? | Yes                                                                                       | Summary data        | Quantification and identification data                         |
| Link to repository / ID to entry                | <a href="https://doi.org/doi:10.25345/C56W06M7">https://doi.org/doi:10.25345/C56W06M7</a> | Raw data upload     | Yes                                                            |
| Are metadata available?                         | Yes                                                                                       | Additional comments | all-ions fragmentation was performed after the IMS separation. |

## Sample Descriptions

### Cell Differentiation / Human / Cells

|                                      |           |                                      |      |
|--------------------------------------|-----------|--------------------------------------|------|
| Storage and collection conditions    | Available | Additives                            | None |
| Provided preanalytical information   | -         | Were samples stored under inert gas? | No   |
| Temperature handling original sample | 4-8 °C    | Additional preservation methods      | No   |
| Instant sample preparation           | No        | Biobank samples                      | No   |
| Storage temperature                  | -80 °C    |                                      |      |

## Lipid Class Descriptions

### 1) CAR, LPC[M+H]<sup>+</sup> / Lipid identification

|                                                   |                    |                                                        |                                                                       |
|---------------------------------------------------|--------------------|--------------------------------------------------------|-----------------------------------------------------------------------|
| Lipid class                                       | CAR, LPC           | Limit of detection                                     | No                                                                    |
| MS Level for identification                       | MS1, MS2           | RT verified by standard                                | No                                                                    |
| Identification level                              | sn Position        | Separation of isobaric/isomeric interferece confirmed  | No                                                                    |
| Polarity mode                                     | Positive           | Model for separation prediction                        | No                                                                    |
| Type of positive (precursor)ion                   | [M+H] <sup>+</sup> | Additional dimension/techniques                        | IMS                                                                   |
| Fragments for identification                      |                    | CCS verified by standard                               | No                                                                    |
| <div>Fragment name</div> <div>(C5H13NO,104)</div> |                    |                                                        |                                                                       |
| Isotope correction at MS1                         | No                 | How was/were the additional dimension(s) used?         | For separation of isobaric/isomeric interferece at MS1 and MS2 levels |
| Isotope correction at MS2                         | No                 | Was a model used to predict lipid molecule separation? | No                                                                    |
| MS1 verified by standard                          | No                 | Lipid Identification Software                          | Skyline                                                               |
| MS2 verified by standard                          | No                 | Data manipulation                                      | -                                                                     |
| Background check at MS1                           | No                 | Nomenclature for intact lipid molecule                 | Yes                                                                   |
| Background check at MS2                           | No                 | Nomenclature for fragment ions                         | Yes                                                                   |
| Did you presume assumptions for identification?   | No                 | Further identification remarks                         | -                                                                     |
| Check on:                                         | -                  |                                                        |                                                                       |

## 1) CAR, LPC[M+H]<sup>+</sup> / Lipid quantification

|                            |    |                                |    |
|----------------------------|----|--------------------------------|----|
| Quantitative               | No | Batch correction               | No |
| Normalization to reference | No | Further quantification remarks | -  |

## 2) CAR, LPC[M+Na]<sup>+</sup> / Lipid identification

|                                                              |                          |                                                        |                                                                |
|--------------------------------------------------------------|--------------------------|--------------------------------------------------------|----------------------------------------------------------------|
| Lipid class                                                  | CAR, LPC                 | Limit of detection                                     | No                                                             |
| MS Level for identification                                  | MS1, MS2                 | RT verified by standard                                | No                                                             |
| Identification level                                         | sn Position              | Separation of isobaric/isomeric interferece confirmed  | No                                                             |
| Polarity mode                                                | Positive                 | Model for separation prediction                        | No                                                             |
| Type of positive (precursor)ion                              | [M+Na] <sup>+</sup>      | Additional dimension/techniques                        | IMS                                                            |
| Fragments for identification                                 | CCS verified by standard | No                                                     |                                                                |
| <div>Fragment name</div> <div>M+Na-TMA</div> <div>M-HG</div> |                          |                                                        |                                                                |
| Isotope correction at MS1                                    | No                       | How was/were the additional dimension(s) used?         | For separation of isobaric/isomeric interferece in MS1 and MS2 |
| Isotope correction at MS2                                    | No                       | Was a model used to predict lipid molecule separation? | No                                                             |
| MS1 verified by standard                                     | No                       | Lipid Identification Software                          | Skyline                                                        |
| MS2 verified by standard                                     | No                       | Data manipulation                                      | -                                                              |
| Background check at MS1                                      | No                       | Nomenclature for intact lipid molecule                 | Yes                                                            |
| Background check at MS2                                      | No                       | Nomenclature for fragment ions                         | N/A                                                            |
| Did you presume assumptions for identification?              | No                       | Further identification remarks                         | -                                                              |
| Check on:                                                    | -                        |                                                        |                                                                |

## 2) CAR, LPC[M+Na]<sup>+</sup> / Lipid quantification

|                            |    |                                |    |
|----------------------------|----|--------------------------------|----|
| Quantitative               | No | Batch correction               | No |
| Normalization to reference | No | Further quantification remarks | -  |

### 3) CAR, PC[M+H]<sup>+</sup> / Lipid identification

|                                                 |                         |                                                        |                                                                           |
|-------------------------------------------------|-------------------------|--------------------------------------------------------|---------------------------------------------------------------------------|
| Lipid class                                     | CAR, PC                 | Limit of detection                                     | No                                                                        |
| MS Level for identification                     | MS1, MS2                | RT verified by standard                                | Yes                                                                       |
| Identification level                            | Molecular species level | Separation of isobaric/isomeric interferece confirmed  | No                                                                        |
| Polarity mode                                   | Positive                | Model for separation prediction                        | No                                                                        |
| Type of positive (precursor)ion                 | [M+H] <sup>+</sup>      | Additional dimension/techniques                        | IMS                                                                       |
| Fragments for identification                    |                         | CCS verified by standard                               | Yes                                                                       |
| Fragment name                                   |                         |                                                        |                                                                           |
| M-FA1                                           |                         |                                                        |                                                                           |
| M-FA2                                           |                         |                                                        |                                                                           |
| Isotope correction at MS1                       | No                      | How was/were the additional dimension(s) used?         | For separation of isobaric/isomeric interferece in MS1 and MS2 dimensions |
| Isotope correction at MS2                       | No                      | Was a model used to predict lipid molecule separation? | No                                                                        |
| MS1 verified by standard                        | No                      | Lipid Identification Software                          | Skyline                                                                   |
| MS2 verified by standard                        | No                      | Data manipulation                                      | -                                                                         |
| Background check at MS1                         | No                      | Nomenclature for intact lipid molecule                 | No                                                                        |
| Background check at MS2                         | No                      | Nomenclature for fragment ions                         | N/A                                                                       |
| Did you presume assumptions for identification? | No                      | Further identification remarks                         | -                                                                         |
| Check on:                                       | -                       |                                                        |                                                                           |

### 3) CAR, PC[M+H]<sup>+</sup> / Lipid quantification

|                            |    |                                |    |
|----------------------------|----|--------------------------------|----|
| Quantitative               | No | Batch correction               | No |
| Normalization to reference | No | Further quantification remarks | -  |

#### 4) CAR, PC[M+Na]<sup>+</sup> / Lipid identification

|                                                                                                                                                                                                                                                     |                          |                                                        |                                                                           |
|-----------------------------------------------------------------------------------------------------------------------------------------------------------------------------------------------------------------------------------------------------|--------------------------|--------------------------------------------------------|---------------------------------------------------------------------------|
| Lipid class                                                                                                                                                                                                                                         | CAR, PC                  | Limit of detection                                     | No                                                                        |
| MS Level for identification                                                                                                                                                                                                                         | MS1, MS2                 | RT verified by standard                                | No                                                                        |
| Identification level                                                                                                                                                                                                                                | Molecular species level  | Separation of isobaric/isomeric interferece confirmed  | No                                                                        |
| Polarity mode                                                                                                                                                                                                                                       | Positive                 | Model for separation prediction                        | No                                                                        |
| Type of positive (precursor)ion                                                                                                                                                                                                                     | [M+Na] <sup>+</sup>      | Additional dimension/techniques                        | IMS                                                                       |
| Fragments for identification                                                                                                                                                                                                                        | CCS verified by standard | No                                                     |                                                                           |
| <div>Fragment name</div> <div>M+Na-FA1</div> <div>M+Na-FA2</div> <div>M+Na-HG</div> <div>M+Na-TMA</div> <div>M+Na-TMA-FA1</div> <div>M+Na-TMA-FA2</div> <div>M-FA1</div> <div>M-FA2</div> <div>M-HG</div> <div>M-TMA-FA1</div> <div>M-TMA-FA2</div> |                          |                                                        |                                                                           |
| Isotope correction at MS1                                                                                                                                                                                                                           | No                       | How was/were the additional dimension(s) used?         | For separation of isobaric/isomeric interferece in MS1 and MS2 dimensions |
| Isotope correction at MS2                                                                                                                                                                                                                           | No                       | Was a model used to predict lipid molecule separation? | No                                                                        |
| MS1 verified by standard                                                                                                                                                                                                                            | No                       | Lipid Identification Software                          | Skyline                                                                   |
| MS2 verified by standard                                                                                                                                                                                                                            | No                       | Data manipulation                                      | -                                                                         |
| Background check at MS1                                                                                                                                                                                                                             | No                       | Nomenclature for intact lipid molecule                 | No                                                                        |
| Background check at MS2                                                                                                                                                                                                                             | No                       | Nomenclature for fragment ions                         | N/A                                                                       |
| Did you presume assumptions for identification?                                                                                                                                                                                                     | No                       | Further identification remarks                         | -                                                                         |
| Check on:                                                                                                                                                                                                                                           | -                        |                                                        |                                                                           |

#### 4) CAR, PC[M+Na]<sup>+</sup> / Lipid quantification

|                            |    |                                |    |
|----------------------------|----|--------------------------------|----|
| Quantitative               | No | Batch correction               | No |
| Normalization to reference | No | Further quantification remarks | -  |

## 5) CAR, PC P[M+H]<sup>+</sup> / Lipid identification

|                                                 |                    |                                                        |                                                                           |
|-------------------------------------------------|--------------------|--------------------------------------------------------|---------------------------------------------------------------------------|
| Lipid class                                     | CAR, PC P          | Limit of detection                                     | No                                                                        |
| MS Level for identification                     | MS1, MS2           | RT verified by standard                                | No                                                                        |
| Identification level                            | sn Position        | Separation of isobaric/isomeric interferece confirmed  | No                                                                        |
| Polarity mode                                   | Positive           | Model for separation prediction                        | No                                                                        |
| Type of positive (precursor)ion                 | [M+H] <sup>+</sup> | Additional dimension/techniques                        | IMS                                                                       |
| Fragments for identification                    |                    | CCS verified by standard                               | No                                                                        |
| Fragment name                                   |                    |                                                        |                                                                           |
| M-FA1                                           |                    |                                                        |                                                                           |
| M-pFA2                                          |                    |                                                        |                                                                           |
| Isotope correction at MS1                       | No                 | How was/were the additional dimension(s) used?         | For separation of isobaric/isomeric interferece in MS1 and MS2 dimensions |
| Isotope correction at MS2                       | No                 | Was a model used to predict lipid molecule separation? | No                                                                        |
| MS1 verified by standard                        | No                 | Lipid Identification Software                          | Skyline                                                                   |
| MS2 verified by standard                        | No                 | Data manipulation                                      | -                                                                         |
| Background check at MS1                         | No                 | Nomenclature for intact lipid molecule                 | No                                                                        |
| Background check at MS2                         | No                 | Nomenclature for fragment ions                         | N/A                                                                       |
| Did you presume assumptions for identification? | No                 | Further identification remarks                         | -                                                                         |
| Check on:                                       | -                  |                                                        |                                                                           |

## 5) CAR, PC P[M+H]<sup>+</sup> / Lipid quantification

|                            |    |                                |    |
|----------------------------|----|--------------------------------|----|
| Quantitative               | No | Batch correction               | No |
| Normalization to reference | No | Further quantification remarks | -  |



## 6) CAR, PC P[M+Na]<sup>+</sup> / Lipid identification

|                                                 |                     |                                                        |                                                                           |
|-------------------------------------------------|---------------------|--------------------------------------------------------|---------------------------------------------------------------------------|
| Lipid class                                     | CAR, PC P           | Limit of detection                                     | No                                                                        |
| MS Level for identification                     | MS1, MS2            | RT verified by standard                                | No                                                                        |
| Identification level                            | sn Position         | Separation of isobaric/isomeric interferece confirmed  | No                                                                        |
| Polarity mode                                   | Positive            | Model for separation prediction                        | No                                                                        |
| Type of positive (precursor)ion                 | [M+Na] <sup>+</sup> | Additional dimension/techniques                        | IMS                                                                       |
| Fragments for identification                    |                     | CCS verified by standard                               | No                                                                        |
| Fragment name                                   |                     |                                                        |                                                                           |
| M+Na-HG                                         |                     |                                                        |                                                                           |
| M+Na-TMA                                        |                     |                                                        |                                                                           |
| M-FA1                                           |                     |                                                        |                                                                           |
| M+Na-FA1                                        |                     |                                                        |                                                                           |
| Isotope correction at MS1                       | No                  | How was/were the additional dimension(s) used?         | For separation of isobaric/isomeric interferece in MS1 and MS2 dimensions |
| Isotope correction at MS2                       | No                  | Was a model used to predict lipid molecule separation? | No                                                                        |
| MS1 verified by standard                        | No                  | Lipid Identification Software                          | Skyline                                                                   |
| MS2 verified by standard                        | No                  | Data manipulation                                      | -                                                                         |
| Background check at MS1                         | No                  | Nomenclature for intact lipid molecule                 | No                                                                        |
| Background check at MS2                         | No                  | Nomenclature for fragment ions                         | N/A                                                                       |
| Did you presume assumptions for identification? | No                  | Further identification remarks                         | -                                                                         |
| Check on:                                       | -                   |                                                        |                                                                           |

## 6) CAR, PC P[M+Na]<sup>+</sup> / Lipid quantification

|                            |    |                                |    |
|----------------------------|----|--------------------------------|----|
| Quantitative               | No | Batch correction               | No |
| Normalization to reference | No | Further quantification remarks | -  |

## 7) CAR, PC[M-H]- / Lipid identification

|                                                                                                                                                                                                                                                                 |                          |                                                        |                                                                           |
|-----------------------------------------------------------------------------------------------------------------------------------------------------------------------------------------------------------------------------------------------------------------|--------------------------|--------------------------------------------------------|---------------------------------------------------------------------------|
| Lipid class                                                                                                                                                                                                                                                     | CAR, PC                  | Limit of detection                                     | No                                                                        |
| MS Level for identification                                                                                                                                                                                                                                     | MS1, MS2                 | RT verified by standard                                | No                                                                        |
| Identification level                                                                                                                                                                                                                                            | Molecular species level  | Separation of isobaric/isomeric interferece confirmed  | No                                                                        |
| Polarity mode                                                                                                                                                                                                                                                   | Negative                 | Model for separation prediction                        | No                                                                        |
| Type of negative (precursor)ion                                                                                                                                                                                                                                 | [M-H]-                   | Additional dimension/techniques                        | IMS                                                                       |
| Fragments for identification                                                                                                                                                                                                                                    | CCS verified by standard | No                                                     |                                                                           |
| <div>Fragment name</div> <div>-(CH3+CH3COO)</div> <div>-FA1 (+OH) -(CH3+CH3COO)</div> <div>-FA1 (-H) -(CH3+CH3COO)</div> <div>-FA2 (+OH) -(CH3+CH3COO)</div> <div>-FA2 (-H) -(CH3+CH3COO)</div> <div>-FA1 (+O)</div> <div>-FA2 (+O)</div> <div>HG(PC,224)</div> |                          |                                                        |                                                                           |
| Isotope correction at MS1                                                                                                                                                                                                                                       | No                       | How was/were the additional dimension(s) used?         | For separation of isobaric/isomeric interferece in MS1 and MS2 dimensions |
| Isotope correction at MS2                                                                                                                                                                                                                                       | No                       | Was a model used to predict lipid molecule separation? | No                                                                        |
| MS1 verified by standard                                                                                                                                                                                                                                        | No                       | Lipid Identification Software                          | Skyline                                                                   |
| MS2 verified by standard                                                                                                                                                                                                                                        | No                       | Data manipulation                                      | -                                                                         |
| Background check at MS1                                                                                                                                                                                                                                         | No                       | Nomenclature for intact lipid molecule                 | No                                                                        |
| Background check at MS2                                                                                                                                                                                                                                         | No                       | Nomenclature for fragment ions                         | N/A                                                                       |
| Did you presume assumptions for identification?                                                                                                                                                                                                                 | No                       | Further identification remarks                         | -                                                                         |
| Check on:                                                                                                                                                                                                                                                       | -                        |                                                        |                                                                           |

## 7) CAR, PC[M-H]- / Lipid quantification

|                            |    |                                |    |
|----------------------------|----|--------------------------------|----|
| Quantitative               | No | Batch correction               | No |
| Normalization to reference | No | Further quantification remarks | -  |

## 8) CAR, PG[M-H]- / Lipid identification

|                                                                                                                                                                                                                       |                          |                                                        |                                                                           |
|-----------------------------------------------------------------------------------------------------------------------------------------------------------------------------------------------------------------------|--------------------------|--------------------------------------------------------|---------------------------------------------------------------------------|
| Lipid class                                                                                                                                                                                                           | CAR, PG                  | Limit of detection                                     | No                                                                        |
| MS Level for identification                                                                                                                                                                                           | MS1, MS2                 | RT verified by standard                                | No                                                                        |
| Identification level                                                                                                                                                                                                  | Molecular species level  | Separation of isobaric/isomeric interferece confirmed  | No                                                                        |
| Polarity mode                                                                                                                                                                                                         | Negative                 | Model for separation prediction                        | No                                                                        |
| Type of negative (precursor)ion                                                                                                                                                                                       | [M-H]-                   | Additional dimension/techniques                        | IMS                                                                       |
| Fragments for identification                                                                                                                                                                                          | CCS verified by standard | No                                                     |                                                                           |
| <div>Fragment name</div> <div>-FA1 (+HO)</div> <div>-FA1 (-H)</div> <div>-FA1(+O)</div> <div>-FA2 (+HO)</div> <div>-FA2 (-H)</div> <div>-FA2(+O)</div> <div>GP(153)</div> <div>HG(PG,171)</div> <div>HG(PG,227)</div> |                          |                                                        |                                                                           |
| Isotope correction at MS1                                                                                                                                                                                             | No                       | How was/were the additional dimension(s) used?         | For separation of isobaric/isomeric interferece in MS1 and MS2 dimensions |
| Isotope correction at MS2                                                                                                                                                                                             | No                       | Was a model used to predict lipid molecule separation? | No                                                                        |
| MS1 verified by standard                                                                                                                                                                                              | No                       | Lipid Identification Software                          | Skyline                                                                   |
| MS2 verified by standard                                                                                                                                                                                              | No                       | Data manipulation                                      | -                                                                         |
| Background check at MS1                                                                                                                                                                                               | No                       | Nomenclature for intact lipid molecule                 | No                                                                        |
| Background check at MS2                                                                                                                                                                                               | No                       | Nomenclature for fragment ions                         | N/A                                                                       |
| Did you presume assumptions for identification?                                                                                                                                                                       | No                       | Further identification remarks                         | -                                                                         |
| Check on:                                                                                                                                                                                                             | -                        |                                                        |                                                                           |

## 8) CAR, PG[M-H]- / Lipid quantification

|                            |    |                                |    |
|----------------------------|----|--------------------------------|----|
| Quantitative               | No | Batch correction               | No |
| Normalization to reference | No | Further quantification remarks | -  |

## 9) CAR, PS[M-H]- / Lipid identification

|                                                                                                                                                                                                      |                          |                                                        |                                                                           |
|------------------------------------------------------------------------------------------------------------------------------------------------------------------------------------------------------|--------------------------|--------------------------------------------------------|---------------------------------------------------------------------------|
| Lipid class                                                                                                                                                                                          | CAR, PS                  | Limit of detection                                     | No                                                                        |
| MS Level for identification                                                                                                                                                                          | MS1, MS2                 | RT verified by standard                                | No                                                                        |
| Identification level                                                                                                                                                                                 | Molecular species level  | Separation of isobaric/isomeric interferece confirmed  | No                                                                        |
| Polarity mode                                                                                                                                                                                        | Negative                 | Model for separation prediction                        | No                                                                        |
| Type of negative (precursor)ion                                                                                                                                                                      | [M-H]-                   | Additional dimension/techniques                        | IMS                                                                       |
| Fragments for identification                                                                                                                                                                         | CCS verified by standard | No                                                     |                                                                           |
| <div>Fragment name</div> <div>-(C3H5NO2,87)</div> <div>-FA1 (+OH)</div> <div>-FA1 (-H)</div> <div>-FA2 (+OH)</div> <div>-FA2 (-H)</div> <div>-FA1 (+O)</div> <div>-FA2 (+O)</div> <div>GP(153)</div> |                          |                                                        |                                                                           |
| Isotope correction at MS1                                                                                                                                                                            | No                       | How was/were the additional dimension(s) used?         | For separation of isobaric/isomeric interferece in MS1 and MS2 dimensions |
| Isotope correction at MS2                                                                                                                                                                            | No                       | Was a model used to predict lipid molecule separation? | No                                                                        |
| MS1 verified by standard                                                                                                                                                                             | No                       | Lipid Identification Software                          | Skyline                                                                   |
| MS2 verified by standard                                                                                                                                                                             | No                       | Data manipulation                                      | -                                                                         |
| Background check at MS1                                                                                                                                                                              | No                       | Nomenclature for intact lipid molecule                 | No                                                                        |
| Background check at MS2                                                                                                                                                                              | No                       | Nomenclature for fragment ions                         | N/A                                                                       |
| Did you presume assumptions for identification?                                                                                                                                                      | No                       | Further identification remarks                         | -                                                                         |
| Check on:                                                                                                                                                                                            | -                        |                                                        |                                                                           |

## 9) CAR, PS[M-H]- / Lipid quantification

|                            |    |                                |    |
|----------------------------|----|--------------------------------|----|
| Quantitative               | No | Batch correction               | No |
| Normalization to reference | No | Further quantification remarks | -  |

## 10) CAR, PE[M-H]- / Lipid identification

|                                                 |                          |                                                        |                                                                           |
|-------------------------------------------------|--------------------------|--------------------------------------------------------|---------------------------------------------------------------------------|
| Lipid class                                     | CAR, PE                  | Limit of detection                                     | No                                                                        |
| MS Level for identification                     | MS1, MS2                 | RT verified by standard                                | No                                                                        |
| Identification level                            | Molecular species level  | Separation of isobaric/isomeric interferece confirmed  | No                                                                        |
| Polarity mode                                   | Negative                 | Model for separation prediction                        | No                                                                        |
| Type of negative (precursor)ion                 | [M-H]-                   | Additional dimension/techniques                        | IMS                                                                       |
| Fragments for identification                    | CCS verified by standard | No                                                     |                                                                           |
| Fragment name                                   |                          |                                                        |                                                                           |
| -FA1 (+OH)                                      |                          |                                                        |                                                                           |
| -FA1 (+O)                                       |                          |                                                        |                                                                           |
| -FA1 (-H)                                       |                          |                                                        |                                                                           |
| -FA2 (+OH)                                      |                          |                                                        |                                                                           |
| -FA2 (+O)                                       |                          |                                                        |                                                                           |
| -FA2 (-H)                                       |                          |                                                        |                                                                           |
| GP(153)                                         |                          |                                                        |                                                                           |
| HG(PE,196)                                      |                          |                                                        |                                                                           |
| Isotope correction at MS1                       | No                       | How was/were the additional dimension(s) used?         | For separation of isobaric/isomeric interferece in MS1 and MS2 dimensions |
| Isotope correction at MS2                       | No                       | Was a model used to predict lipid molecule separation? | No                                                                        |
| MS1 verified by standard                        | No                       | Lipid Identification Software                          | Skyline                                                                   |
| MS2 verified by standard                        | No                       | Data manipulation                                      | -                                                                         |
| Background check at MS1                         | No                       | Nomenclature for intact lipid molecule                 | No                                                                        |
| Background check at MS2                         | No                       | Nomenclature for fragment ions                         | N/A                                                                       |
| Did you presume assumptions for identification? | No                       | Further identification remarks                         | -                                                                         |
| Check on:                                       | -                        |                                                        |                                                                           |

## 10) CAR, PE[M-H]- / Lipid quantification

|                            |    |                                |    |
|----------------------------|----|--------------------------------|----|
| Quantitative               | No | Batch correction               | No |
| Normalization to reference | No | Further quantification remarks | -  |

## 11) CAR, Cer[M+CH<sub>3</sub>COO]<sup>-</sup> / Lipid identification

|                                                 |                                      |                                                        |                                                                           |
|-------------------------------------------------|--------------------------------------|--------------------------------------------------------|---------------------------------------------------------------------------|
| Lipid class                                     | CAR, Cer                             | Limit of detection                                     | No                                                                        |
| MS Level for identification                     | MS1, MS2                             | RT verified by standard                                | No                                                                        |
| Identification level                            | Species level                        | Separation of isobaric/isomeric interferece confirmed  | No                                                                        |
| Polarity mode                                   | Negative                             | Model for separation prediction                        | No                                                                        |
| Type of negative (precursor)ion                 | [M+CH <sub>3</sub> COO] <sup>-</sup> | Additional dimension/techniques                        | IMS                                                                       |
| Fragments for identification                    |                                      | CCS verified by standard                               | No                                                                        |
| Fragment name                                   |                                      |                                                        |                                                                           |
| FA (+C <sub>2</sub> H <sub>3</sub> N)           |                                      |                                                        |                                                                           |
| FA (+C <sub>2</sub> H <sub>3</sub> NO)          |                                      |                                                        |                                                                           |
| FA (+HN)                                        |                                      |                                                        |                                                                           |
| LCB (-C <sub>2</sub> H <sub>8</sub> NO)         |                                      |                                                        |                                                                           |
| LCB (-CH <sub>3</sub> O)                        |                                      |                                                        |                                                                           |
| LCB (-H <sub>6</sub> NO)                        |                                      |                                                        |                                                                           |
| Isotope correction at MS1                       | No                                   | How was/were the additional dimension(s) used?         | For separation of isobaric/isomeric interferece in MS1 and MS2 dimensions |
| Isotope correction at MS2                       | No                                   | Was a model used to predict lipid molecule separation? | No                                                                        |
| MS1 verified by standard                        | No                                   | Lipid Identification Software                          | Skyline                                                                   |
| MS2 verified by standard                        | No                                   | Data manipulation                                      | -                                                                         |
| Background check at MS1                         | No                                   | Nomenclature for intact lipid molecule                 | No                                                                        |
| Background check at MS2                         | No                                   | Nomenclature for fragment ions                         | N/A                                                                       |
| Did you presume assumptions for identification? | No                                   | Further identification remarks                         | -                                                                         |
| Check on:                                       | -                                    |                                                        |                                                                           |

## 11) CAR, Cer[M+CH<sub>3</sub>COO]<sup>-</sup> / Lipid quantification

|                            |    |                                |    |
|----------------------------|----|--------------------------------|----|
| Quantitative               | No | Batch correction               | No |
| Normalization to reference | No | Further quantification remarks | -  |

## 12) CAR, Cer[M+HCOO]- / Lipid identification

|                                                 |                         |                                                        |                                                                           |
|-------------------------------------------------|-------------------------|--------------------------------------------------------|---------------------------------------------------------------------------|
| Lipid class                                     | CAR, Cer                | Limit of detection                                     | No                                                                        |
| MS Level for identification                     | MS1, MS2                | RT verified by standard                                | No                                                                        |
| Identification level                            | Molecular species level | Separation of isobaric/isomeric interferece confirmed  | No                                                                        |
| Polarity mode                                   | Negative                | Model for separation prediction                        | No                                                                        |
| Type of negative (precursor)ion                 | [M+HCOO]-               | Additional dimension/techniques                        | IMS                                                                       |
| Fragments for identification                    |                         | CCS verified by standard                               | No                                                                        |
| Fragment name                                   |                         |                                                        |                                                                           |
| FA (+C2H3N)                                     |                         |                                                        |                                                                           |
| FA (+C2H3NO)                                    |                         |                                                        |                                                                           |
| FA (+HN)                                        |                         |                                                        |                                                                           |
| LCB (-C2H8NO)                                   |                         |                                                        |                                                                           |
| LCB (-CH3O)                                     |                         |                                                        |                                                                           |
| LCB (-H6NO)                                     |                         |                                                        |                                                                           |
| Isotope correction at MS1                       | No                      | How was/were the additional dimension(s) used?         | For separation of isobaric/isomeric interferece in MS1 and MS2 dimensions |
| Isotope correction at MS2                       | No                      | Was a model used to predict lipid molecule separation? | No                                                                        |
| MS1 verified by standard                        | No                      | Lipid Identification Software                          | Skyline                                                                   |
| MS2 verified by standard                        | No                      | Data manipulation                                      | -                                                                         |
| Background check at MS1                         | No                      | Nomenclature for intact lipid molecule                 | No                                                                        |
| Background check at MS2                         | No                      | Nomenclature for fragment ions                         | N/A                                                                       |
| Did you presume assumptions for identification? | No                      | Further identification remarks                         | -                                                                         |
| Check on:                                       | -                       |                                                        |                                                                           |

## 12) CAR, Cer[M+HCOO]- / Lipid quantification

|                            |    |                                |    |
|----------------------------|----|--------------------------------|----|
| Quantitative               | No | Batch correction               | No |
| Normalization to reference | No | Further quantification remarks | -  |

### 13) CAR, Cer[M-H]- / Lipid identification

|                                                 |                          |                                                        |                                                                           |
|-------------------------------------------------|--------------------------|--------------------------------------------------------|---------------------------------------------------------------------------|
| Lipid class                                     | CAR, Cer                 | Limit of detection                                     | No                                                                        |
| MS Level for identification                     | MS1, MS2                 | RT verified by standard                                | No                                                                        |
| Identification level                            | Molecular species level  | Separation of isobaric/isomeric interferece confirmed  | No                                                                        |
| Polarity mode                                   | Negative                 | Model for separation prediction                        | No                                                                        |
| Type of negative (precursor)ion                 | [M-H]-                   | Additional dimension/techniques                        | IMS                                                                       |
| Fragments for identification                    | CCS verified by standard | No                                                     |                                                                           |
| Fragment name                                   |                          |                                                        |                                                                           |
| FA (+C2H3N)                                     |                          |                                                        |                                                                           |
| FA (+C2H3NO)                                    |                          |                                                        |                                                                           |
| FA (+HN)                                        |                          |                                                        |                                                                           |
| LCB (-C2H8NO)                                   |                          |                                                        |                                                                           |
| LCB (-CH3O)                                     |                          |                                                        |                                                                           |
| LCB (-H6NO)                                     |                          |                                                        |                                                                           |
| Isotope correction at MS1                       | No                       | How was/were the additional dimension(s) used?         | For separation of isobaric/isomeric interferece in MS1 and MS2 dimensions |
| Isotope correction at MS2                       | No                       | Was a model used to predict lipid molecule separation? | No                                                                        |
| MS1 verified by standard                        | No                       | Lipid Identification Software                          | Skyline                                                                   |
| MS2 verified by standard                        | No                       | Data manipulation                                      | -                                                                         |
| Background check at MS1                         | No                       | Nomenclature for intact lipid molecule                 | No                                                                        |
| Background check at MS2                         | No                       | Nomenclature for fragment ions                         | N/A                                                                       |
| Did you presume assumptions for identification? | No                       | Further identification remarks                         | -                                                                         |
| Check on:                                       | -                        |                                                        |                                                                           |

### 13) CAR, Cer[M-H]- / Lipid quantification

|                            |    |                                |    |
|----------------------------|----|--------------------------------|----|
| Quantitative               | No | Batch correction               | No |
| Normalization to reference | No | Further quantification remarks | -  |



#### 14) CAR, FA[M-H]- / Lipid identification

|                                                 |               |                                                        |                                                                           |
|-------------------------------------------------|---------------|--------------------------------------------------------|---------------------------------------------------------------------------|
| Lipid class                                     | CAR, FA       | RT verified by standard                                | No                                                                        |
| MS Level for identification                     | MS1           | Separation of isobaric/isomeric interferece confirmed  | No                                                                        |
| Identification level                            | Species level | Model for separation prediction                        | No                                                                        |
| Polarity mode                                   | Negative      | Additional dimension/techniques                        | IMS                                                                       |
| Type of negative (precursor)ion                 | [M-H]-        | CCS verified by standard                               | No                                                                        |
| Isotope correction at MS1                       | No            | How was/were the additional dimension(s) used?         | For separation of isobaric/isomeric interferece in MS1 and MS2 dimensions |
| MS1 verified by standard                        | No            | Was a model used to predict lipid molecule separation? | No                                                                        |
| Background check at MS1                         | No            | Lipid Identification Software                          | Skyline                                                                   |
| Did you presume assumptions for identification? | No            | Data manipulation                                      | -                                                                         |
| Check on:                                       | -             | Nomenclature for intact lipid molecule                 | No                                                                        |
| Limit of detection                              | No            | Further identification remarks                         | -                                                                         |

#### 14) CAR, FA[M-H]- / Lipid quantification

|                            |    |                                |    |
|----------------------------|----|--------------------------------|----|
| Quantitative               | No | Batch correction               | No |
| Normalization to reference | No | Further quantification remarks | -  |

## 15) CAR, GM3[M-H]- / Lipid identification

|                                                 |                          |                                                        |                                                                           |
|-------------------------------------------------|--------------------------|--------------------------------------------------------|---------------------------------------------------------------------------|
| Lipid class                                     | CAR, GM3                 | Limit of detection                                     | No                                                                        |
| MS Level for identification                     | MS1, MS2                 | RT verified by standard                                | No                                                                        |
| Identification level                            | Species level            | Separation of isobaric/isomeric interferece confirmed  | No                                                                        |
| Polarity mode                                   | Negative                 | Model for separation prediction                        | No                                                                        |
| Type of negative (precursor)ion                 | [M-H]-                   | Additional dimension/techniques                        | IMS                                                                       |
| Fragments for identification                    | CCS verified by standard | No                                                     |                                                                           |
| Fragment name                                   |                          |                                                        |                                                                           |
| -HG(NH <sub>ex</sub> ,291)                      |                          |                                                        |                                                                           |
| -HG(NH <sub>ex</sub> 2,453)                     |                          |                                                        |                                                                           |
| -HG(NH <sub>ex</sub> 3,615)                     |                          |                                                        |                                                                           |
| -HG(NH <sub>ex</sub> 2,471)                     |                          |                                                        |                                                                           |
| -HG(NH <sub>ex</sub> 2,633)                     |                          |                                                        |                                                                           |
| HG(NH <sub>ex</sub> , 290)                      |                          |                                                        |                                                                           |
| Isotope correction at MS1                       | No                       | How was/were the additional dimension(s) used?         | For separation of isobaric/isomeric interferece in MS1 and Ms2 dimensions |
| Isotope correction at MS2                       | No                       | Was a model used to predict lipid molecule separation? | No                                                                        |
| MS1 verified by standard                        | No                       | Lipid Identification Software                          | Skyline                                                                   |
| MS2 verified by standard                        | No                       | Data manipulation                                      | -                                                                         |
| Background check at MS1                         | No                       | Nomenclature for intact lipid molecule                 | No                                                                        |
| Background check at MS2                         | No                       | Nomenclature for fragment ions                         | N/A                                                                       |
| Did you presume assumptions for identification? | No                       | Further identification remarks                         | -                                                                         |
| Check on:                                       | -                        |                                                        |                                                                           |

## 15) CAR, GM3[M-H]- / Lipid quantification

|                            |    |                                |    |
|----------------------------|----|--------------------------------|----|
| Quantitative               | No | Batch correction               | No |
| Normalization to reference | No | Further quantification remarks | -  |

## 16) CAR, HexCer[M+CH3COO]- / Lipid identification

|                                                 |                         |                                                        |                                                                           |
|-------------------------------------------------|-------------------------|--------------------------------------------------------|---------------------------------------------------------------------------|
| Lipid class                                     | CAR, HexCer             | Limit of detection                                     | No                                                                        |
| MS Level for identification                     | MS1, MS2                | RT verified by standard                                | No                                                                        |
| Identification level                            | Molecular species level | Separation of isobaric/isomeric interferece confirmed  | No                                                                        |
| Polarity mode                                   | Negative                | Model for separation prediction                        | No                                                                        |
| Type of negative (precursor)ion                 | [M+CH3COO]-             | Additional dimension/techniques                        | IMS                                                                       |
| Fragments for identification                    |                         | CCS verified by standard                               | No                                                                        |
| Fragment name                                   |                         |                                                        |                                                                           |
| -HG(Hex,162)                                    |                         |                                                        |                                                                           |
| -HG(Hex,180)                                    |                         |                                                        |                                                                           |
| FA (+C2H3N)                                     |                         |                                                        |                                                                           |
| FA (+C2H3NO)                                    |                         |                                                        |                                                                           |
| FA (+NO)                                        |                         |                                                        |                                                                           |
| LCB (-CH3O)                                     |                         |                                                        |                                                                           |
| LCB (-H6NO)                                     |                         |                                                        |                                                                           |
| LCB (-C2H8NO)                                   |                         |                                                        |                                                                           |
| Isotope correction at MS1                       | No                      | How was/were the additional dimension(s) used?         | For separation of isobaric/isomeric interferece of MS1 and MS2 dimensions |
| Isotope correction at MS2                       | No                      | Was a model used to predict lipid molecule separation? | No                                                                        |
| MS1 verified by standard                        | No                      | Lipid Identification Software                          | Skyline                                                                   |
| MS2 verified by standard                        | No                      | Data manipulation                                      | -                                                                         |
| Background check at MS1                         | No                      | Nomenclature for intact lipid molecule                 | No                                                                        |
| Background check at MS2                         | No                      | Nomenclature for fragment ions                         | N/A                                                                       |
| Did you presume assumptions for identification? | No                      | Further identification remarks                         | -                                                                         |
| Check on:                                       | -                       |                                                        |                                                                           |

## 16) CAR, HexCer[M+CH3COO]- / Lipid quantification

|                            |    |                                |    |
|----------------------------|----|--------------------------------|----|
| Quantitative               | No | Batch correction               | No |
| Normalization to reference | No | Further quantification remarks | -  |

## 17) CAR, HexCer[M+HCOO]- / Lipid identification

|                                                                                                                                                                                                                     |                          |                                                        |                                                                           |
|---------------------------------------------------------------------------------------------------------------------------------------------------------------------------------------------------------------------|--------------------------|--------------------------------------------------------|---------------------------------------------------------------------------|
| Lipid class                                                                                                                                                                                                         | CAR, HexCer              | Limit of detection                                     | No                                                                        |
| MS Level for identification                                                                                                                                                                                         | MS1, MS2                 | RT verified by standard                                | No                                                                        |
| Identification level                                                                                                                                                                                                | Molecular species level  | Separation of isobaric/isomeric interferece confirmed  | No                                                                        |
| Polarity mode                                                                                                                                                                                                       | Negative                 | Model for separation prediction                        | No                                                                        |
| Type of negative (precursor)ion                                                                                                                                                                                     | [M+HCOO]-                | Additional dimension/techniques                        | IMS                                                                       |
| Fragments for identification                                                                                                                                                                                        | CCS verified by standard | No                                                     |                                                                           |
| <div>Fragment name</div> <div>-HG(Hex,162)</div> <div>-HG(Hex,180)</div> <div>FA (+C2H3N)</div> <div>FA (+C2H3NO)</div> <div>FA (+HN)</div> <div>LCB (-C2H8NO)</div> <div>LCB (-CH3NO)</div> <div>LCB (-H6NO)</div> |                          |                                                        |                                                                           |
| Isotope correction at MS1                                                                                                                                                                                           | No                       | How was/were the additional dimension(s) used?         | For separation of isobaric/isomeric interferece of MS1 and MS2 dimensions |
| Isotope correction at MS2                                                                                                                                                                                           | No                       | Was a model used to predict lipid molecule separation? | No                                                                        |
| MS1 verified by standard                                                                                                                                                                                            | No                       | Lipid Identification Software                          | Skyline                                                                   |
| MS2 verified by standard                                                                                                                                                                                            | No                       | Data manipulation                                      | -                                                                         |
| Background check at MS1                                                                                                                                                                                             | No                       | Nomenclature for intact lipid molecule                 | No                                                                        |
| Background check at MS2                                                                                                                                                                                             | No                       | Nomenclature for fragment ions                         | N/A                                                                       |
| Did you presume assumptions for identification?                                                                                                                                                                     | No                       | Further identification remarks                         | -                                                                         |
| Check on:                                                                                                                                                                                                           | -                        |                                                        |                                                                           |

## 17) CAR, HexCer[M+HCOO]- / Lipid quantification

|                            |    |                                |    |
|----------------------------|----|--------------------------------|----|
| Quantitative               | No | Batch correction               | No |
| Normalization to reference | No | Further quantification remarks | -  |

## 18) CAR, HexCer[M-H]- / Lipid identification

|                                                 |                          |                                                        |                                                                           |
|-------------------------------------------------|--------------------------|--------------------------------------------------------|---------------------------------------------------------------------------|
| Lipid class                                     | CAR, HexCer              | Limit of detection                                     | No                                                                        |
| MS Level for identification                     | MS1, MS2                 | RT verified by standard                                | No                                                                        |
| Identification level                            | Molecular species level  | Separation of isobaric/isomeric interferece confirmed  | No                                                                        |
| Polarity mode                                   | Negative                 | Model for separation prediction                        | No                                                                        |
| Type of negative (precursor)ion                 | [M-H]-                   | Additional dimension/techniques                        | IMS                                                                       |
| Fragments for identification                    | CCS verified by standard | No                                                     |                                                                           |
| Fragment name                                   |                          |                                                        |                                                                           |
| FA (+C2H3O)                                     |                          |                                                        |                                                                           |
| FA (+C2H3NO)                                    |                          |                                                        |                                                                           |
| FA (+HN)                                        |                          |                                                        |                                                                           |
| LCB (-C2H8NO)                                   |                          |                                                        |                                                                           |
| LCB (-CH3O)                                     |                          |                                                        |                                                                           |
| LCB (-H6NO)                                     |                          |                                                        |                                                                           |
| Isotope correction at MS1                       | No                       | How was/were the additional dimension(s) used?         | For separation of isobaric/isomeric interferece of MS1 and MS2 dimensions |
| Isotope correction at MS2                       | No                       | Was a model used to predict lipid molecule separation? | No                                                                        |
| MS1 verified by standard                        | No                       | Lipid Identification Software                          | Skyline                                                                   |
| MS2 verified by standard                        | No                       | Data manipulation                                      | -                                                                         |
| Background check at MS1                         | No                       | Nomenclature for intact lipid molecule                 | No                                                                        |
| Background check at MS2                         | No                       | Nomenclature for fragment ions                         | N/A                                                                       |
| Did you presume assumptions for identification? | No                       | Further identification remarks                         | -                                                                         |
| Check on:                                       | -                        |                                                        |                                                                           |

## 18) CAR, HexCer[M-H]- / Lipid quantification

|                            |    |                                |    |
|----------------------------|----|--------------------------------|----|
| Quantitative               | No | Batch correction               | No |
| Normalization to reference | No | Further quantification remarks | -  |

## 19) CAR, LPC[M+CH3COO]- / Lipid identification

|                                                 |             |                                                        |                                                                           |
|-------------------------------------------------|-------------|--------------------------------------------------------|---------------------------------------------------------------------------|
| Lipid class                                     | CAR, LPC    | Limit of detection                                     | No                                                                        |
| MS Level for identification                     | MS1, MS2    | RT verified by standard                                | No                                                                        |
| Identification level                            | sn Position | Separation of isobaric/isomeric interferece confirmed  | No                                                                        |
| Polarity mode                                   | Negative    | Model for separation prediction                        | No                                                                        |
| Type of negative (precursor)ion                 | [M+CH3COO]- | Additional dimension/techniques                        | IMS                                                                       |
| Fragments for identification                    |             | CCS verified by standard                               | No                                                                        |
| Fragment name                                   |             |                                                        |                                                                           |
| HG(PC,224)                                      |             |                                                        |                                                                           |
| FA1(+O)                                         |             |                                                        |                                                                           |
| -(CH3+CH3COO)                                   |             |                                                        |                                                                           |
| Isotope correction at MS1                       | No          | How was/were the additional dimension(s) used?         | For separation of isobaric/isomeric interferece of MS1 and MS2 dimensions |
| Isotope correction at MS2                       | No          | Was a model used to predict lipid molecule separation? | No                                                                        |
| MS1 verified by standard                        | No          | Lipid Identification Software                          | Skyline                                                                   |
| MS2 verified by standard                        | No          | Data manipulation                                      | -                                                                         |
| Background check at MS1                         | No          | Nomenclature for intact lipid molecule                 | No                                                                        |
| Background check at MS2                         | No          | Nomenclature for fragment ions                         | N/A                                                                       |
| Did you presume assumptions for identification? | No          | Further identification remarks                         | -                                                                         |
| Check on:                                       | -           |                                                        |                                                                           |

## 19) CAR, LPC[M+CH3COO]- / Lipid quantification

|                            |    |                                |    |
|----------------------------|----|--------------------------------|----|
| Quantitative               | No | Batch correction               | No |
| Normalization to reference | No | Further quantification remarks | -  |

## 20) CAR, LPE[M-H]- / Lipid identification

|                                                                                                               |                          |                                                        |                                                                            |
|---------------------------------------------------------------------------------------------------------------|--------------------------|--------------------------------------------------------|----------------------------------------------------------------------------|
| Lipid class                                                                                                   | CAR, LPE                 | Limit of detection                                     | No                                                                         |
| MS Level for identification                                                                                   | MS1, MS2                 | RT verified by standard                                | No                                                                         |
| Identification level                                                                                          | sn Position              | Separation of isobaric/isomeric interferece confirmed  | No                                                                         |
| Polarity mode                                                                                                 | Negative                 | Model for separation prediction                        | No                                                                         |
| Type of negative (precursor)ion                                                                               | [M-H]-                   | Additional dimension/techniques                        | IMS                                                                        |
| Fragments for identification                                                                                  | CCS verified by standard | No                                                     |                                                                            |
| <div>Fragment name</div> <div>-FA1(-H)-(H2O)</div> <div>-FA1(-H)</div> <div>GP(153)</div> <div>-FA1(+O)</div> |                          |                                                        |                                                                            |
| Isotope correction at MS1                                                                                     | No                       | How was/were the additional dimension(s) used?         | For separation of isobaric/isomeric interferece for MS1 and MS2 dimensions |
| Isotope correction at MS2                                                                                     | No                       | Was a model used to predict lipid molecule separation? | No                                                                         |
| MS1 verified by standard                                                                                      | No                       | Lipid Identification Software                          | Skyline                                                                    |
| MS2 verified by standard                                                                                      | No                       | Data manipulation                                      | -                                                                          |
| Background check at MS1                                                                                       | No                       | Nomenclature for intact lipid molecule                 | No                                                                         |
| Background check at MS2                                                                                       | No                       | Nomenclature for fragment ions                         | N/A                                                                        |
| Did you presume assumptions for identification?                                                               | No                       | Further identification remarks                         | -                                                                          |
| Check on:                                                                                                     | -                        |                                                        |                                                                            |

## 20) CAR, LPE[M-H]- / Lipid quantification

|                            |    |                                |    |
|----------------------------|----|--------------------------------|----|
| Quantitative               | No | Batch correction               | No |
| Normalization to reference | No | Further quantification remarks | -  |

## 21) CAR, LPA[M-H]- / Lipid identification

|                                                 |                          |                                                        |                                                                            |
|-------------------------------------------------|--------------------------|--------------------------------------------------------|----------------------------------------------------------------------------|
| Lipid class                                     | CAR, LPA                 | Limit of detection                                     | No                                                                         |
| MS Level for identification                     | MS1, MS2                 | RT verified by standard                                | No                                                                         |
| Identification level                            | Molecular species level  | Separation of isobaric/isomeric interferece confirmed  | No                                                                         |
| Polarity mode                                   | Negative                 | Model for separation prediction                        | No                                                                         |
| Type of negative (precursor)ion                 | [M-H]-                   | Additional dimension/techniques                        | IMS                                                                        |
| Fragments for identification                    | CCS verified by standard | No                                                     |                                                                            |
| Fragment name                                   |                          |                                                        |                                                                            |
| GP(153)                                         |                          |                                                        |                                                                            |
| P(79)                                           |                          |                                                        |                                                                            |
| FA1 (+O)                                        |                          |                                                        |                                                                            |
| Isotope correction at MS1                       | No                       | How was/were the additional dimension(s) used?         | For separation of isobaric/isomeric interferece for MS1 and MS2 dimensions |
| Isotope correction at MS2                       | No                       | Was a model used to predict lipid molecule separation? | No                                                                         |
| MS1 verified by standard                        | No                       | Lipid Identification Software                          | Skyline                                                                    |
| MS2 verified by standard                        | No                       | Data manipulation                                      | -                                                                          |
| Background check at MS1                         | No                       | Nomenclature for intact lipid molecule                 | No                                                                         |
| Background check at MS2                         | No                       | Nomenclature for fragment ions                         | N/A                                                                        |
| Did you presume assumptions for identification? | No                       | Further identification remarks                         | -                                                                          |
| Check on:                                       | -                        |                                                        |                                                                            |

## 21) CAR, LPA[M-H]- / Lipid quantification

|                            |    |                                |    |
|----------------------------|----|--------------------------------|----|
| Quantitative               | No | Batch correction               | No |
| Normalization to reference | No | Further quantification remarks | -  |



## 22) CAR, LPG[M-H]- / Lipid identification

|                                                                                                          |                          |                                                        |                                                                            |
|----------------------------------------------------------------------------------------------------------|--------------------------|--------------------------------------------------------|----------------------------------------------------------------------------|
| Lipid class                                                                                              | CAR, LPG                 | Limit of detection                                     | No                                                                         |
| MS Level for identification                                                                              | MS1, MS2                 | RT verified by standard                                | No                                                                         |
| Identification level                                                                                     | Molecular species level  | Separation of isobaric/isomeric interferece confirmed  | No                                                                         |
| Polarity mode                                                                                            | Negative                 | Model for separation prediction                        | No                                                                         |
| Type of negative (precursor)ion                                                                          | [M-H]-                   | Additional dimension/techniques                        | IMS                                                                        |
| Fragments for identification                                                                             | CCS verified by standard | No                                                     |                                                                            |
| <div>Fragment name</div> <div>GP(153)</div> <div>-FA1(-H)</div> <div>-FA1(+HO)</div> <div>-FA1(+O)</div> |                          |                                                        |                                                                            |
| Isotope correction at MS1                                                                                | No                       | How was/were the additional dimension(s) used?         | For separation of isobaric/isomeric interferece for MS1 and MS2 dimensions |
| Isotope correction at MS2                                                                                | No                       | Was a model used to predict lipid molecule separation? | No                                                                         |
| MS1 verified by standard                                                                                 | No                       | Lipid Identification Software                          | Skyline                                                                    |
| MS2 verified by standard                                                                                 | No                       | Data manipulation                                      | -                                                                          |
| Background check at MS1                                                                                  | No                       | Nomenclature for intact lipid molecule                 | No                                                                         |
| Background check at MS2                                                                                  | No                       | Nomenclature for fragment ions                         | N/A                                                                        |
| Did you presume assumptions for identification?                                                          | No                       | Further identification remarks                         | -                                                                          |
| Check on:                                                                                                | -                        |                                                        |                                                                            |

## 22) CAR, LPG[M-H]- / Lipid quantification

|                            |    |                                |    |
|----------------------------|----|--------------------------------|----|
| Quantitative               | No | Batch correction               | No |
| Normalization to reference | No | Further quantification remarks | -  |

### 23) CAR, PA[M-H]- / Lipid identification

|                                                 |                          |                                                        |                                                                            |
|-------------------------------------------------|--------------------------|--------------------------------------------------------|----------------------------------------------------------------------------|
| Lipid class                                     | CAR, PA                  | Limit of detection                                     | No                                                                         |
| MS Level for identification                     | MS1, MS2                 | RT verified by standard                                | No                                                                         |
| Identification level                            | Molecular species level  | Separation of isobaric/isomeric interferece confirmed  | No                                                                         |
| Polarity mode                                   | Negative                 | Model for separation prediction                        | No                                                                         |
| Type of negative (precursor)ion                 | [M-H]-                   | Additional dimension/techniques                        | IMS                                                                        |
| Fragments for identification                    | CCS verified by standard | No                                                     |                                                                            |
| Fragment name                                   |                          |                                                        |                                                                            |
| GP(153)                                         |                          |                                                        |                                                                            |
| FA1(+O)                                         |                          |                                                        |                                                                            |
| FA1(+HO)                                        |                          |                                                        |                                                                            |
| FA1(-H)                                         |                          |                                                        |                                                                            |
| FA2(+O)                                         |                          |                                                        |                                                                            |
| FA2(+HO)                                        |                          |                                                        |                                                                            |
| FA2(-H)                                         |                          |                                                        |                                                                            |
| Isotope correction at MS1                       | No                       | How was/were the additional dimension(s) used?         | For separation of isobaric/isomeric interferece for MS1 and MS2 dimensions |
| Isotope correction at MS2                       | No                       | Was a model used to predict lipid molecule separation? | No                                                                         |
| MS1 verified by standard                        | No                       | Lipid Identification Software                          | Skyline                                                                    |
| MS2 verified by standard                        | No                       | Data manipulation                                      | -                                                                          |
| Background check at MS1                         | No                       | Nomenclature for intact lipid molecule                 | No                                                                         |
| Background check at MS2                         | No                       | Nomenclature for fragment ions                         | N/A                                                                        |
| Did you presume assumptions for identification? | No                       | Further identification remarks                         | -                                                                          |
| Check on:                                       | -                        |                                                        |                                                                            |

### 23) CAR, PA[M-H]- / Lipid quantification

|                            |    |                                |    |
|----------------------------|----|--------------------------------|----|
| Quantitative               | No | Batch correction               | No |
| Normalization to reference | No | Further quantification remarks | -  |

## 24) CAR, PC P[M+CH<sub>3</sub>COO]<sup>-</sup> / Lipid identification

|                                                 |                                      |                                                        |                                                                                 |
|-------------------------------------------------|--------------------------------------|--------------------------------------------------------|---------------------------------------------------------------------------------|
| Lipid class                                     | CAR, PC P                            | Limit of detection                                     | No                                                                              |
| MS Level for identification                     | MS1, MS2                             | RT verified by standard                                | No                                                                              |
| Identification level                            | Molecular species level              | Separation of isobaric/isomeric interferece confirmed  | No                                                                              |
| Polarity mode                                   | Negative                             | Model for separation prediction                        | No                                                                              |
| Type of negative (precursor)ion                 | [M+CH <sub>3</sub> COO] <sup>-</sup> | Additional dimension/techniques                        | IMS                                                                             |
| Fragments for identification                    |                                      | CCS verified by standard                               | No                                                                              |
| Fragment name                                   |                                      |                                                        |                                                                                 |
| HG(PC)-(CH <sub>3</sub> +CH <sub>3</sub> COO)   |                                      |                                                        |                                                                                 |
| (CH <sub>3</sub> +CH <sub>3</sub> COO)          |                                      |                                                        |                                                                                 |
| FA1 (+OH)                                       |                                      |                                                        |                                                                                 |
| FA1 (-CO)                                       |                                      |                                                        |                                                                                 |
| FA1 (+O)                                        |                                      |                                                        |                                                                                 |
| FA1 (-H)                                        |                                      |                                                        |                                                                                 |
| FA O-[xx:x]                                     |                                      |                                                        |                                                                                 |
| Isotope correction at MS1                       | No                                   | How was/were the additional dimension(s) used?         | For separation of isobaric/isomeric interferece for MS1 and MS2 identifications |
| Isotope correction at MS2                       | No                                   | Was a model used to predict lipid molecule separation? | No                                                                              |
| MS1 verified by standard                        | No                                   | Lipid Identification Software                          | Skyline                                                                         |
| MS2 verified by standard                        | No                                   | Data manipulation                                      | -                                                                               |
| Background check at MS1                         | No                                   | Nomenclature for intact lipid molecule                 | No                                                                              |
| Background check at MS2                         | No                                   | Nomenclature for fragment ions                         | N/A                                                                             |
| Did you presume assumptions for identification? | No                                   | Further identification remarks                         | -                                                                               |
| Check on:                                       | -                                    |                                                        |                                                                                 |

## 24) CAR, PC P[M+CH<sub>3</sub>COO]<sup>-</sup> / Lipid quantification

|                            |    |                                |    |
|----------------------------|----|--------------------------------|----|
| Quantitative               | No | Batch correction               | No |
| Normalization to reference | No | Further quantification remarks | -  |

## 25) CAR, PC O[M+CH<sub>3</sub>COO]<sup>-</sup> / Lipid identification

|                                                 |                                      |                                                        |                                                                            |
|-------------------------------------------------|--------------------------------------|--------------------------------------------------------|----------------------------------------------------------------------------|
| Lipid class                                     | CAR, PC O                            | Limit of detection                                     | No                                                                         |
| MS Level for identification                     | MS1, MS2                             | RT verified by standard                                | No                                                                         |
| Identification level                            | Molecular species level              | Separation of isobaric/isomeric interferece confirmed  | No                                                                         |
| Polarity mode                                   | Negative                             | Model for separation prediction                        | No                                                                         |
| Type of negative (precursor)ion                 | [M+CH <sub>3</sub> COO] <sup>-</sup> | Additional dimension/techniques                        | IMS                                                                        |
| Fragments for identification                    |                                      | CCS verified by standard                               | No                                                                         |
| Fragment name                                   |                                      |                                                        |                                                                            |
| HG(PC)-(CH <sub>3</sub> +CH <sub>3</sub> COO)   |                                      |                                                        |                                                                            |
| FA O-[xx:x]                                     |                                      |                                                        |                                                                            |
| FA1(+HO)                                        |                                      |                                                        |                                                                            |
| FA1(+O)                                         |                                      |                                                        |                                                                            |
| FA1-(CO)                                        |                                      |                                                        |                                                                            |
| FA1(-H)                                         |                                      |                                                        |                                                                            |
| -(CH <sub>3</sub> +CH <sub>3</sub> COO)         |                                      |                                                        |                                                                            |
| Isotope correction at MS1                       | No                                   | How was/were the additional dimension(s) used?         | For separation of isobaric/isomeric interferece for MS1 and MS2 dimensions |
| Isotope correction at MS2                       | No                                   | Was a model used to predict lipid molecule separation? | No                                                                         |
| MS1 verified by standard                        | No                                   | Lipid Identification Software                          | Skyline                                                                    |
| MS2 verified by standard                        | No                                   | Data manipulation                                      | -                                                                          |
| Background check at MS1                         | No                                   | Nomenclature for intact lipid molecule                 | No                                                                         |
| Background check at MS2                         | No                                   | Nomenclature for fragment ions                         | N/A                                                                        |
| Did you presume assumptions for identification? | No                                   | Further identification remarks                         | -                                                                          |
| Check on:                                       | -                                    |                                                        |                                                                            |

## 25) CAR, PC O[M+CH<sub>3</sub>COO]<sup>-</sup> / Lipid quantification

|                            |    |                                |    |
|----------------------------|----|--------------------------------|----|
| Quantitative               | No | Batch correction               | No |
| Normalization to reference | No | Further quantification remarks | -  |

## 26) CAR, PI[M-H]- / Lipid identification

|                                                                                                                                                                                            |                          |                                                        |                                                                           |
|--------------------------------------------------------------------------------------------------------------------------------------------------------------------------------------------|--------------------------|--------------------------------------------------------|---------------------------------------------------------------------------|
| Lipid class                                                                                                                                                                                | CAR, PI                  | Limit of detection                                     | No                                                                        |
| MS Level for identification                                                                                                                                                                | MS1, MS2                 | RT verified by standard                                | No                                                                        |
| Identification level                                                                                                                                                                       | Molecular species level  | Separation of isobaric/isomeric interferece confirmed  | No                                                                        |
| Polarity mode                                                                                                                                                                              | Negative                 | Model for separation prediction                        | No                                                                        |
| Type of negative (precursor)ion                                                                                                                                                            | [M-H]-                   | Additional dimension/techniques                        | IMS                                                                       |
| Fragments for identification                                                                                                                                                               | CCS verified by standard | No                                                     |                                                                           |
| <div>Fragment name</div> <div>-FA1(-H)</div> <div>FA1(+O)</div> <div>-FA1(+HO)</div> <div>-FA2(-H)</div> <div>-FA2(+O)</div> <div>-FA2(+HO)</div> <div>GP(153)</div> <div>HG(PI,241)</div> |                          |                                                        |                                                                           |
| Isotope correction at MS1                                                                                                                                                                  | No                       | How was/were the additional dimension(s) used?         | For separation of isobaric/isomeric interferece in MS1 and MS2 dimensions |
| Isotope correction at MS2                                                                                                                                                                  | No                       | Was a model used to predict lipid molecule separation? | No                                                                        |
| MS1 verified by standard                                                                                                                                                                   | No                       | Lipid Identification Software                          | Skyline                                                                   |
| MS2 verified by standard                                                                                                                                                                   | No                       | Data manipulation                                      | -                                                                         |
| Background check at MS1                                                                                                                                                                    | No                       | Nomenclature for intact lipid molecule                 | No                                                                        |
| Background check at MS2                                                                                                                                                                    | No                       | Nomenclature for fragment ions                         | N/A                                                                       |
| Did you presume assumptions for identification?                                                                                                                                            | No                       | Further identification remarks                         | -                                                                         |
| Check on:                                                                                                                                                                                  | -                        |                                                        |                                                                           |

## 26) CAR, PI[M-H]- / Lipid quantification

|                            |    |                                |    |
|----------------------------|----|--------------------------------|----|
| Quantitative               | No | Batch correction               | No |
| Normalization to reference | No | Further quantification remarks | -  |

## 27) CAR, PE P[M-H]- / Lipid identification

|                                                 |                          |                                                        |                                                                            |
|-------------------------------------------------|--------------------------|--------------------------------------------------------|----------------------------------------------------------------------------|
| Lipid class                                     | CAR, PE P                | Limit of detection                                     | No                                                                         |
| MS Level for identification                     | MS1, MS2                 | RT verified by standard                                | No                                                                         |
| Identification level                            | Molecular species level  | Separation of isobaric/isomeric interferece confirmed  | No                                                                         |
| Polarity mode                                   | Negative                 | Model for separation prediction                        | No                                                                         |
| Type of negative (precursor)ion                 | [M-H]-                   | Additional dimension/techniques                        | IMS                                                                        |
| Fragments for identification                    | CCS verified by standard | No                                                     |                                                                            |
| Fragment name                                   |                          |                                                        |                                                                            |
| FA2 -(CO)                                       |                          |                                                        |                                                                            |
| -FA2(-H)                                        |                          |                                                        |                                                                            |
| -FA2(+HO)                                       |                          |                                                        |                                                                            |
| FA2(+O)                                         |                          |                                                        |                                                                            |
| FA O-[xx:x]                                     |                          |                                                        |                                                                            |
| HG(PE,196)                                      |                          |                                                        |                                                                            |
| Isotope correction at MS1                       | No                       | How was/were the additional dimension(s) used?         | For separation of isobaric/isomeric interferece in MS1 and MS21 dimensions |
| Isotope correction at MS2                       | No                       | Was a model used to predict lipid molecule separation? | No                                                                         |
| MS1 verified by standard                        | No                       | Lipid Identification Software                          | Skyline                                                                    |
| MS2 verified by standard                        | No                       | Data manipulation                                      | -                                                                          |
| Background check at MS1                         | No                       | Nomenclature for intact lipid molecule                 | No                                                                         |
| Background check at MS2                         | No                       | Nomenclature for fragment ions                         | N/A                                                                        |
| Did you presume assumptions for identification? | No                       | Further identification remarks                         | -                                                                          |
| Check on:                                       | -                        |                                                        |                                                                            |

## 27) CAR, PE P[M-H]- / Lipid quantification

|                            |    |                                |    |
|----------------------------|----|--------------------------------|----|
| Quantitative               | No | Batch correction               | No |
| Normalization to reference | No | Further quantification remarks | -  |

## 28) CAR, PE O[M-H]- / Lipid identification

|                                                 |                          |                                                        |                                                                           |
|-------------------------------------------------|--------------------------|--------------------------------------------------------|---------------------------------------------------------------------------|
| Lipid class                                     | CAR, PE O                | Limit of detection                                     | No                                                                        |
| MS Level for identification                     | MS1, MS2                 | RT verified by standard                                | No                                                                        |
| Identification level                            | Molecular species level  | Separation of isobaric/isomeric interferece confirmed  | No                                                                        |
| Polarity mode                                   | Negative                 | Model for separation prediction                        | No                                                                        |
| Type of negative (precursor)ion                 | [M-H]-                   | Additional dimension/techniques                        | IMS                                                                       |
| Fragments for identification                    | CCS verified by standard | No                                                     |                                                                           |
| Fragment name                                   |                          |                                                        |                                                                           |
| FA2 -(CO)                                       |                          |                                                        |                                                                           |
| -FA2(-H)                                        |                          |                                                        |                                                                           |
| -FA2(+HO)                                       |                          |                                                        |                                                                           |
| FA2(+O)                                         |                          |                                                        |                                                                           |
| GP(135)                                         |                          |                                                        |                                                                           |
| GP(153)                                         |                          |                                                        |                                                                           |
| Isotope correction at MS1                       | No                       | How was/were the additional dimension(s) used?         | For separation of isobaric/isomeric interferece in MS1 and MS2 dimensions |
| Isotope correction at MS2                       | No                       | Was a model used to predict lipid molecule separation? | No                                                                        |
| MS1 verified by standard                        | No                       | Lipid Identification Software                          | Skyline                                                                   |
| MS2 verified by standard                        | No                       | Data manipulation                                      | -                                                                         |
| Background check at MS1                         | No                       | Nomenclature for intact lipid molecule                 | No                                                                        |
| Background check at MS2                         | No                       | Nomenclature for fragment ions                         | N/A                                                                       |
| Did you presume assumptions for identification? | No                       | Further identification remarks                         | -                                                                         |
| Check on:                                       | -                        |                                                        |                                                                           |

## 28) CAR, PE O[M-H]- / Lipid quantification

|                            |    |                                |    |
|----------------------------|----|--------------------------------|----|
| Quantitative               | No | Batch correction               | No |
| Normalization to reference | No | Further quantification remarks | -  |

## 29) CAR, SM[M-H]- / Lipid identification

|                                                 |                         |                                                        |                                                                           |
|-------------------------------------------------|-------------------------|--------------------------------------------------------|---------------------------------------------------------------------------|
| Lipid class                                     | CAR, SM                 | Limit of detection                                     | No                                                                        |
| MS Level for identification                     | MS1, MS2                | RT verified by standard                                | No                                                                        |
| Identification level                            | Molecular species level | Separation of isobaric/isomeric interferece confirmed  | No                                                                        |
| Polarity mode                                   | Negative                | Model for separation prediction                        | No                                                                        |
| Type of negative (precursor)ion                 | [M-H]-                  | Additional dimension/techniques                        | IMS                                                                       |
| Fragments for identification                    |                         | CCS verified by standard                               | No                                                                        |
| Fragment name                                   |                         |                                                        |                                                                           |
| HG(PC,168)                                      |                         |                                                        |                                                                           |
| FA1(+O)                                         |                         |                                                        |                                                                           |
| Isotope correction at MS1                       | No                      | How was/were the additional dimension(s) used?         | For separation of isobaric/isomeric interferece in MS1 and MS2 dimensions |
| Isotope correction at MS2                       | No                      | Was a model used to predict lipid molecule separation? | No                                                                        |
| MS1 verified by standard                        | No                      | Lipid Identification Software                          | Skyline                                                                   |
| MS2 verified by standard                        | No                      | Data manipulation                                      | -                                                                         |
| Background check at MS1                         | No                      | Nomenclature for intact lipid molecule                 | No                                                                        |
| Background check at MS2                         | No                      | Nomenclature for fragment ions                         | N/A                                                                       |
| Did you presume assumptions for identification? | No                      | Further identification remarks                         | -                                                                         |
| Check on:                                       | -                       |                                                        |                                                                           |

## 29) CAR, SM[M-H]- / Lipid quantification

|                            |    |                                |    |
|----------------------------|----|--------------------------------|----|
| Quantitative               | No | Batch correction               | No |
| Normalization to reference | No | Further quantification remarks | -  |



### 30) CAR, AC[M+H]<sup>+</sup> / Lipid identification

|                                                 |                    |                                                        |                                                                           |
|-------------------------------------------------|--------------------|--------------------------------------------------------|---------------------------------------------------------------------------|
| Lipid class                                     | CAR, AC            | Limit of detection                                     | No                                                                        |
| MS Level for identification                     | MS1, MS2           | RT verified by standard                                | No                                                                        |
| Identification level                            | Species level      | Separation of isobaric/isomeric interferece confirmed  | No                                                                        |
| Polarity mode                                   | Positive           | Model for separation prediction                        | No                                                                        |
| Type of positive (precursor)ion                 | [M+H] <sup>+</sup> | Additional dimension/techniques                        | IMS                                                                       |
| Fragments for identification                    |                    | CCS verified by standard                               | No                                                                        |
| Fragment name                                   |                    |                                                        |                                                                           |
| M-FA-TMA                                        |                    |                                                        |                                                                           |
| Isotope correction at MS1                       | No                 | How was/were the additional dimension(s) used?         | For separation of isobaric/isomeric interferece in MS1 and MS2 dimensions |
| Isotope correction at MS2                       | No                 | Was a model used to predict lipid molecule separation? | No                                                                        |
| MS1 verified by standard                        | No                 | Lipid Identification Software                          | Skyline                                                                   |
| MS2 verified by standard                        | No                 | Data manipulation                                      | -                                                                         |
| Background check at MS1                         | No                 | Nomenclature for intact lipid molecule                 | No                                                                        |
| Background check at MS2                         | No                 | Nomenclature for fragment ions                         | N/A                                                                       |
| Did you presume assumptions for identification? | No                 | Further identification remarks                         | -                                                                         |
| Check on:                                       | -                  |                                                        |                                                                           |

### 30) CAR, AC[M+H]<sup>+</sup> / Lipid quantification

|                            |    |                                |    |
|----------------------------|----|--------------------------------|----|
| Quantitative               | No | Batch correction               | No |
| Normalization to reference | No | Further quantification remarks | -  |

### 31) CAR, ANA[M+H]<sup>+</sup> / Lipid identification

|                                                 |                    |                                                        |                                                 |
|-------------------------------------------------|--------------------|--------------------------------------------------------|-------------------------------------------------|
| Lipid class                                     | CAR, ANA           | RT verified by standard                                | No                                              |
| MS Level for identification                     | MS1                | Separation of isobaric/isomeric interferece confirmed  | No                                              |
| Identification level                            | Species level      | Model for separation prediction                        | No                                              |
| Polarity mode                                   | Positive           | Additional dimension/techniques                        | IMS                                             |
| Type of positive (precursor)ion                 | [M+H] <sup>+</sup> | CCS verified by standard                               | No                                              |
| Isotope correction at MS1                       | No                 | How was/were the additional dimension(s) used?         | For separation of isobaric/isomeric interferece |
| MS1 verified by standard                        | No                 | Was a model used to predict lipid molecule separation? | No                                              |
| Background check at MS1                         | No                 | Lipid Identification Software                          | Skyline                                         |
| Did you presume assumptions for identification? | No                 | Data manipulation                                      | -                                               |
| Check on:                                       | -                  | Nomenclature for intact lipid molecule                 | No                                              |
| Limit of detection                              | No                 | Further identification remarks                         | -                                               |

### 31) CAR, ANA[M+H]<sup>+</sup> / Lipid quantification

|                            |    |                                |    |
|----------------------------|----|--------------------------------|----|
| Quantitative               | No | Batch correction               | No |
| Normalization to reference | No | Further quantification remarks | -  |

### 32) CAR, SE[M+NH<sub>4</sub>]<sup>+</sup> / Lipid identification

|                                                               |                                   |                                                        |                                                                           |
|---------------------------------------------------------------|-----------------------------------|--------------------------------------------------------|---------------------------------------------------------------------------|
| Lipid class                                                   | CAR, SE                           | Limit of detection                                     | No                                                                        |
| MS Level for identification                                   | MS1, MS2                          | RT verified by standard                                | No                                                                        |
| Identification level                                          | Species level                     | Separation of isobaric/isomeric interferece confirmed  | No                                                                        |
| Polarity mode                                                 | Positive                          | Model for separation prediction                        | No                                                                        |
| Type of positive (precursor)ion                               | [M+NH <sub>4</sub> ] <sup>+</sup> | Additional dimension/techniques                        | IMS                                                                       |
| Fragments for identification                                  | CCS verified by standard          | No                                                     |                                                                           |
| <div>Fragment name</div> <div>-FA1(+HO)-Cholesterol(35)</div> |                                   |                                                        |                                                                           |
| Isotope correction at MS1                                     | No                                | How was/were the additional dimension(s) used?         | For separation of isobaric/isomeric interferece in MS1 and MS2 dimensions |
| Isotope correction at MS2                                     | No                                | Was a model used to predict lipid molecule separation? | No                                                                        |
| MS1 verified by standard                                      | No                                | Lipid Identification Software                          | Skyline                                                                   |
| MS2 verified by standard                                      | No                                | Data manipulation                                      | -                                                                         |
| Background check at MS1                                       | No                                | Nomenclature for intact lipid molecule                 | No                                                                        |
| Background check at MS2                                       | No                                | Nomenclature for fragment ions                         | N/A                                                                       |
| Did you presume assumptions for identification?               | No                                | Further identification remarks                         | -                                                                         |
| Check on:                                                     | -                                 |                                                        |                                                                           |

### 32) CAR, SE[M+NH<sub>4</sub>]<sup>+</sup> / Lipid quantification

|                            |    |                                |    |
|----------------------------|----|--------------------------------|----|
| Quantitative               | No | Batch correction               | No |
| Normalization to reference | No | Further quantification remarks | -  |

### 33) CAR, Cer[M+H]<sup>+</sup> / Lipid identification

|                                                 |                         |                                                        |                                                                           |
|-------------------------------------------------|-------------------------|--------------------------------------------------------|---------------------------------------------------------------------------|
| Lipid class                                     | CAR, Cer                | Limit of detection                                     | No                                                                        |
| MS Level for identification                     | MS1, MS2                | RT verified by standard                                | No                                                                        |
| Identification level                            | Molecular species level | Separation of isobaric/isomeric interferece confirmed  | No                                                                        |
| Polarity mode                                   | Positive                | Model for separation prediction                        | No                                                                        |
| Type of positive (precursor)ion                 | [M+H] <sup>+</sup>      | Additional dimension/techniques                        | IMS                                                                       |
| Fragments for identification                    |                         | CCS verified by standard                               | No                                                                        |
| Fragment name                                   |                         |                                                        |                                                                           |
| LCB(-CH3O2)                                     |                         |                                                        |                                                                           |
| LCB(-H3O2)                                      |                         |                                                        |                                                                           |
| LCB(-HO)                                        |                         |                                                        |                                                                           |
| Isotope correction at MS1                       | No                      | How was/were the additional dimension(s) used?         | For separation of isobaric/isomeric interferece in MS1 and MS2 dimensions |
| Isotope correction at MS2                       | No                      | Was a model used to predict lipid molecule separation? | No                                                                        |
| MS1 verified by standard                        | No                      | Lipid Identification Software                          | Skyline                                                                   |
| MS2 verified by standard                        | No                      | Data manipulation                                      | -                                                                         |
| Background check at MS1                         | No                      | Nomenclature for intact lipid molecule                 | No                                                                        |
| Background check at MS2                         | No                      | Nomenclature for fragment ions                         | N/A                                                                       |
| Did you presume assumptions for identification? | No                      | Further identification remarks                         | -                                                                         |
| Check on:                                       | -                       |                                                        |                                                                           |

### 33) CAR, Cer[M+H]<sup>+</sup> / Lipid quantification

|                            |    |                                |    |
|----------------------------|----|--------------------------------|----|
| Quantitative               | No | Batch correction               | No |
| Normalization to reference | No | Further quantification remarks | -  |

### 34) CAR, DG[M+NH4]<sup>+</sup> / Lipid identification

|                                                 |                         |                                                        |                                                                           |
|-------------------------------------------------|-------------------------|--------------------------------------------------------|---------------------------------------------------------------------------|
| Lipid class                                     | CAR, DG                 | Limit of detection                                     | No                                                                        |
| MS Level for identification                     | MS1, MS2                | RT verified by standard                                | No                                                                        |
| Identification level                            | Molecular species level | Separation of isobaric/isomeric interferece confirmed  | No                                                                        |
| Polarity mode                                   | Positive                | Model for separation prediction                        | No                                                                        |
| Type of positive (precursor)ion                 | [M+NH4] <sup>+</sup>    | Additional dimension/techniques                        | IMS                                                                       |
| Fragments for identification                    |                         | CCS verified by standard                               | No                                                                        |
| Fragment name                                   |                         |                                                        |                                                                           |
| -FA1(-H)-(H2O+NH3)                              |                         |                                                        |                                                                           |
| -FA2(-H)-(H2O+NH3)                              |                         |                                                        |                                                                           |
| Isotope correction at MS1                       | No                      | How was/were the additional dimension(s) used?         | For separation of isobaric/isomeric interferece in MS1 and MS2 dimensions |
| Isotope correction at MS2                       | No                      | Was a model used to predict lipid molecule separation? | No                                                                        |
| MS1 verified by standard                        | No                      | Lipid Identification Software                          | Skyline                                                                   |
| MS2 verified by standard                        | No                      | Data manipulation                                      | -                                                                         |
| Background check at MS1                         | No                      | Nomenclature for intact lipid molecule                 | No                                                                        |
| Background check at MS2                         | No                      | Nomenclature for fragment ions                         | N/A                                                                       |
| Did you presume assumptions for identification? | No                      | Further identification remarks                         | -                                                                         |
| Check on:                                       | -                       |                                                        |                                                                           |

### 34) CAR, DG[M+NH4]<sup>+</sup> / Lipid quantification

|                            |    |                                |    |
|----------------------------|----|--------------------------------|----|
| Quantitative               | No | Batch correction               | No |
| Normalization to reference | No | Further quantification remarks | -  |

### 35) CAR, LPE[M+H]<sup>+</sup> / Lipid identification

|                                                 |                    |                                                        |                                                                           |
|-------------------------------------------------|--------------------|--------------------------------------------------------|---------------------------------------------------------------------------|
| Lipid class                                     | CAR, LPE           | Limit of detection                                     | No                                                                        |
| MS Level for identification                     | MS1, MS2           | RT verified by standard                                | No                                                                        |
| Identification level                            | sn Position        | Separation of isobaric/isomeric interferece confirmed  | No                                                                        |
| Polarity mode                                   | Positive           | Model for separation prediction                        | No                                                                        |
| Type of positive (precursor)ion                 | [M+H] <sup>+</sup> | Additional dimension/techniques                        | IMS                                                                       |
| Fragments for identification                    |                    | CCS verified by standard                               | No                                                                        |
| Fragment name                                   |                    |                                                        |                                                                           |
| -HG(PE,141)                                     |                    |                                                        |                                                                           |
| Isotope correction at MS1                       | No                 | How was/were the additional dimension(s) used?         | For separation of isobaric/isomeric interferece of MS1 and MS2 dimensions |
| Isotope correction at MS2                       | No                 | Was a model used to predict lipid molecule separation? | No                                                                        |
| MS1 verified by standard                        | No                 | Lipid Identification Software                          | Skyline                                                                   |
| MS2 verified by standard                        | No                 | Data manipulation                                      | -                                                                         |
| Background check at MS1                         | No                 | Nomenclature for intact lipid molecule                 | No                                                                        |
| Background check at MS2                         | No                 | Nomenclature for fragment ions                         | N/A                                                                       |
| Did you presume assumptions for identification? | No                 | Further identification remarks                         | -                                                                         |
| Check on:                                       | -                  |                                                        |                                                                           |

### 35) CAR, LPE[M+H]<sup>+</sup> / Lipid quantification

|                            |    |                                |    |
|----------------------------|----|--------------------------------|----|
| Quantitative               | No | Batch correction               | No |
| Normalization to reference | No | Further quantification remarks | -  |

### 36) CAR, LPE[M+Na]<sup>+</sup> / Lipid identification

|                                                 |                     |                                                        |                                                                           |
|-------------------------------------------------|---------------------|--------------------------------------------------------|---------------------------------------------------------------------------|
| Lipid class                                     | CAR, LPE            | Limit of detection                                     | No                                                                        |
| MS Level for identification                     | MS1, MS2            | RT verified by standard                                | No                                                                        |
| Identification level                            | sn Position         | Separation of isobaric/isomeric interferece confirmed  | No                                                                        |
| Polarity mode                                   | Positive            | Model for separation prediction                        | No                                                                        |
| Type of positive (precursor)ion                 | [M+Na] <sup>+</sup> | Additional dimension/techniques                        | IMS                                                                       |
| Fragments for identification                    |                     | CCS verified by standard                               | No                                                                        |
| Fragment name                                   |                     |                                                        |                                                                           |
| M-HG                                            |                     |                                                        |                                                                           |
| M <sup>+</sup> Na-az                            |                     |                                                        |                                                                           |
| Isotope correction at MS1                       | No                  | How was/were the additional dimension(s) used?         | For separation of isobaric/isomeric interferece in MS1 and MS2 dimensions |
| Isotope correction at MS2                       | No                  | Was a model used to predict lipid molecule separation? | No                                                                        |
| MS1 verified by standard                        | No                  | Lipid Identification Software                          | Skyline                                                                   |
| MS2 verified by standard                        | No                  | Data manipulation                                      | -                                                                         |
| Background check at MS1                         | No                  | Nomenclature for intact lipid molecule                 | No                                                                        |
| Background check at MS2                         | No                  | Nomenclature for fragment ions                         | N/A                                                                       |
| Did you presume assumptions for identification? | No                  | Further identification remarks                         | -                                                                         |
| Check on:                                       | -                   |                                                        |                                                                           |

### 36) CAR, LPE[M+Na]<sup>+</sup> / Lipid quantification

|                            |    |                                |    |
|----------------------------|----|--------------------------------|----|
| Quantitative               | No | Batch correction               | No |
| Normalization to reference | No | Further quantification remarks | -  |

### 37) CAR, PC O[M+H]<sup>+</sup> / Lipid identification

|                                                 |                         |                                                        |                                                                           |
|-------------------------------------------------|-------------------------|--------------------------------------------------------|---------------------------------------------------------------------------|
| Lipid class                                     | CAR, PC O               | Limit of detection                                     | No                                                                        |
| MS Level for identification                     | MS1, MS2                | RT verified by standard                                | No                                                                        |
| Identification level                            | Molecular species level | Separation of isobaric/isomeric interferece confirmed  | No                                                                        |
| Polarity mode                                   | Positive                | Model for separation prediction                        | No                                                                        |
| Type of positive (precursor)ion                 | [M+H] <sup>+</sup>      | Additional dimension/techniques                        | IMS                                                                       |
| Fragments for identification                    |                         | CCS verified by standard                               | No                                                                        |
| Fragment name                                   |                         |                                                        |                                                                           |
| M-FA1                                           |                         |                                                        |                                                                           |
| M-oFA2                                          |                         |                                                        |                                                                           |
| Isotope correction at MS1                       | No                      | How was/were the additional dimension(s) used?         | For separation of isobaric/isomeric interferece in MS1 and MS2 dimensions |
| Isotope correction at MS2                       | No                      | Was a model used to predict lipid molecule separation? | No                                                                        |
| MS1 verified by standard                        | No                      | Lipid Identification Software                          | Skyline                                                                   |
| MS2 verified by standard                        | No                      | Data manipulation                                      | -                                                                         |
| Background check at MS1                         | No                      | Nomenclature for intact lipid molecule                 | No                                                                        |
| Background check at MS2                         | No                      | Nomenclature for fragment ions                         | N/A                                                                       |
| Did you presume assumptions for identification? | No                      | Further identification remarks                         | -                                                                         |
| Check on:                                       | -                       |                                                        |                                                                           |

### 37) CAR, PC O[M+H]<sup>+</sup> / Lipid quantification

|                            |    |                                |    |
|----------------------------|----|--------------------------------|----|
| Quantitative               | No | Batch correction               | No |
| Normalization to reference | No | Further quantification remarks | -  |

### 38) CAR, PC O[M+Na]<sup>+</sup> / Lipid identification

|                                                 |                         |                                                        |                                                                           |
|-------------------------------------------------|-------------------------|--------------------------------------------------------|---------------------------------------------------------------------------|
| Lipid class                                     | CAR, PC O               | Limit of detection                                     | No                                                                        |
| MS Level for identification                     | MS1, MS2                | RT verified by standard                                | No                                                                        |
| Identification level                            | Molecular species level | Separation of isobaric/isomeric interferece confirmed  | No                                                                        |
| Polarity mode                                   | Positive                | Model for separation prediction                        | No                                                                        |
| Type of positive (precursor)ion                 | [M+Na] <sup>+</sup>     | Additional dimension/techniques                        | IMS                                                                       |
| Fragments for identification                    |                         | CCS verified by standard                               | No                                                                        |
| Fragment name                                   |                         |                                                        |                                                                           |
| M+Na-HG                                         |                         |                                                        |                                                                           |
| M+Na-TMA                                        |                         |                                                        |                                                                           |
| M-FA                                            |                         |                                                        |                                                                           |
| Isotope correction at MS1                       | No                      | How was/were the additional dimension(s) used?         | For separation of isobaric/isomeric interferece in MS1 and MS2 dimensions |
| Isotope correction at MS2                       | No                      | Was a model used to predict lipid molecule separation? | No                                                                        |
| MS1 verified by standard                        | No                      | Lipid Identification Software                          | Skyline                                                                   |
| MS2 verified by standard                        | No                      | Data manipulation                                      | -                                                                         |
| Background check at MS1                         | No                      | Nomenclature for intact lipid molecule                 | No                                                                        |
| Background check at MS2                         | No                      | Nomenclature for fragment ions                         | N/A                                                                       |
| Did you presume assumptions for identification? | No                      | Further identification remarks                         | -                                                                         |
| Check on:                                       | -                       |                                                        |                                                                           |

### 38) CAR, PC O[M+Na]<sup>+</sup> / Lipid quantification

|                            |    |                                |    |
|----------------------------|----|--------------------------------|----|
| Quantitative               | No | Batch correction               | No |
| Normalization to reference | No | Further quantification remarks | -  |



### 39) CAR, PE[M+H]<sup>+</sup> / Lipid identification

|                                                 |                         |                                                        |                                                                           |
|-------------------------------------------------|-------------------------|--------------------------------------------------------|---------------------------------------------------------------------------|
| Lipid class                                     | CAR, PE                 | Limit of detection                                     | No                                                                        |
| MS Level for identification                     | MS1, MS2                | RT verified by standard                                | No                                                                        |
| Identification level                            | Molecular species level | Separation of isobaric/isomeric interferece confirmed  | No                                                                        |
| Polarity mode                                   | Positive                | Model for separation prediction                        | No                                                                        |
| Type of positive (precursor)ion                 | [M+H] <sup>+</sup>      | Additional dimension/techniques                        | IMS                                                                       |
| Fragments for identification                    |                         | CCS verified by standard                               | No                                                                        |
| Fragment name                                   |                         |                                                        |                                                                           |
| -HG(PE,141)                                     |                         |                                                        |                                                                           |
| FA1 (+O)                                        |                         |                                                        |                                                                           |
| FA2 (+O)                                        |                         |                                                        |                                                                           |
| Isotope correction at MS1                       | No                      | How was/were the additional dimension(s) used?         | For separation of isobaric/isomeric interferece in MS1 and MS2 dimensions |
| Isotope correction at MS2                       | No                      | Was a model used to predict lipid molecule separation? | No                                                                        |
| MS1 verified by standard                        | No                      | Lipid Identification Software                          | Skyline                                                                   |
| MS2 verified by standard                        | No                      | Data manipulation                                      | -                                                                         |
| Background check at MS1                         | No                      | Nomenclature for intact lipid molecule                 | No                                                                        |
| Background check at MS2                         | No                      | Nomenclature for fragment ions                         | N/A                                                                       |
| Did you presume assumptions for identification? | No                      | Further identification remarks                         | -                                                                         |
| Check on:                                       | -                       |                                                        |                                                                           |

### 39) CAR, PE[M+H]<sup>+</sup> / Lipid quantification

|                            |    |                                |    |
|----------------------------|----|--------------------------------|----|
| Quantitative               | No | Batch correction               | No |
| Normalization to reference | No | Further quantification remarks | -  |

#### 40) CAR, PE[M+Na]<sup>+</sup> / Lipid identification

|                                                 |                         |                                                        |                                                                            |
|-------------------------------------------------|-------------------------|--------------------------------------------------------|----------------------------------------------------------------------------|
| Lipid class                                     | CAR, PE                 | Limit of detection                                     | No                                                                         |
| MS Level for identification                     | MS1, MS2                | RT verified by standard                                | No                                                                         |
| Identification level                            | Molecular species level | Separation of isobaric/isomeric interference confirmed | No                                                                         |
| Polarity mode                                   | Positive                | Model for separation prediction                        | No                                                                         |
| Type of positive (precursor)ion                 | [M+Na] <sup>+</sup>     | Additional dimension/techniques                        | IMS                                                                        |
| Fragments for identification                    |                         | CCS verified by standard                               | No                                                                         |
| Fragment name                                   |                         |                                                        |                                                                            |
| M-HG                                            |                         |                                                        |                                                                            |
| M+Na-HG                                         |                         |                                                        |                                                                            |
| M+Na-az                                         |                         |                                                        |                                                                            |
| M+Na-C2H5N-FA1                                  |                         |                                                        |                                                                            |
| M+Na-C2H5N-FA2                                  |                         |                                                        |                                                                            |
| Isotope correction at MS1                       | No                      | How was/were the additional dimension(s) used?         | For separation of isobaric/isomeric interference in MS1 and MS2 dimensions |
| Isotope correction at MS2                       | No                      | Was a model used to predict lipid molecule separation? | No                                                                         |
| MS1 verified by standard                        | No                      | Lipid Identification Software                          | Skyline                                                                    |
| MS2 verified by standard                        | No                      | Data manipulation                                      | -                                                                          |
| Background check at MS1                         | No                      | Nomenclature for intact lipid molecule                 | No                                                                         |
| Background check at MS2                         | No                      | Nomenclature for fragment ions                         | N/A                                                                        |
| Did you presume assumptions for identification? | No                      | Further identification remarks                         | -                                                                          |
| Check on:                                       | -                       |                                                        |                                                                            |

#### 40) CAR, PE[M+Na]<sup>+</sup> / Lipid quantification

|                            |    |                                |    |
|----------------------------|----|--------------------------------|----|
| Quantitative               | No | Batch correction               | No |
| Normalization to reference | No | Further quantification remarks | -  |

#### 41) CAR, SM[M+H]<sup>+</sup> / Lipid identification

|                                                 |                         |                                                        |                                                                           |
|-------------------------------------------------|-------------------------|--------------------------------------------------------|---------------------------------------------------------------------------|
| Lipid class                                     | CAR, SM                 | Limit of detection                                     | No                                                                        |
| MS Level for identification                     | MS1, MS2                | RT verified by standard                                | No                                                                        |
| Identification level                            | Molecular species level | Separation of isobaric/isomeric interferece confirmed  | No                                                                        |
| Polarity mode                                   | Positive                | Model for separation prediction                        | No                                                                        |
| Type of positive (precursor)ion                 | [M+H] <sup>+</sup>      | Additional dimension/techniques                        | IMS                                                                       |
| Fragments for identification                    |                         | CCS verified by standard                               | No                                                                        |
| Fragment name                                   |                         |                                                        |                                                                           |
| LCB(-H3O2)                                      |                         |                                                        |                                                                           |
| Isotope correction at MS1                       | No                      | How was/were the additional dimension(s) used?         | For separation of isobaric/isomeric interferece in MS1 and MS2 dimensions |
| Isotope correction at MS2                       | No                      | Was a model used to predict lipid molecule separation? | No                                                                        |
| MS1 verified by standard                        | No                      | Lipid Identification Software                          | Skyline                                                                   |
| MS2 verified by standard                        | No                      | Data manipulation                                      | -                                                                         |
| Background check at MS1                         | No                      | Nomenclature for intact lipid molecule                 | No                                                                        |
| Background check at MS2                         | No                      | Nomenclature for fragment ions                         | N/A                                                                       |
| Did you presume assumptions for identification? | No                      | Further identification remarks                         | -                                                                         |
| Check on:                                       | -                       |                                                        |                                                                           |

#### 41) CAR, SM[M+H]<sup>+</sup> / Lipid quantification

|                            |    |                                |    |
|----------------------------|----|--------------------------------|----|
| Quantitative               | No | Batch correction               | No |
| Normalization to reference | No | Further quantification remarks | -  |

## 42) CAR, TG[M+NH4]<sup>+</sup> / Lipid identification

|                                                                                                                                                        |                          |                                                        |                                                                           |
|--------------------------------------------------------------------------------------------------------------------------------------------------------|--------------------------|--------------------------------------------------------|---------------------------------------------------------------------------|
| Lipid class                                                                                                                                            | CAR, TG                  | Limit of detection                                     | No                                                                        |
| MS Level for identification                                                                                                                            | MS1, MS2                 | RT verified by standard                                | No                                                                        |
| Identification level                                                                                                                                   | Molecular species level  | Separation of isobaric/isomeric interferece confirmed  | No                                                                        |
| Polarity mode                                                                                                                                          | Positive                 | Model for separation prediction                        | No                                                                        |
| Type of positive (precursor)ion                                                                                                                        | [M+NH4] <sup>+</sup>     | Additional dimension/techniques                        | IMS                                                                       |
| Fragments for identification                                                                                                                           | CCS verified by standard | No                                                     |                                                                           |
| <div>Fragment name</div> <div>-FA3(+HO)-(NH3)</div> <div>-FA2(+HO)-(NH3)</div> <div>-FA1(+HO)-(NH3)</div> <div>FA3</div> <div>FA2</div> <div>FA1</div> |                          |                                                        |                                                                           |
| Isotope correction at MS1                                                                                                                              | No                       | How was/were the additional dimension(s) used?         | For separation of isobaric/isomeric interferece of MS1 and MS2 dimensions |
| Isotope correction at MS2                                                                                                                              | No                       | Was a model used to predict lipid molecule separation? | No                                                                        |
| MS1 verified by standard                                                                                                                               | No                       | Lipid Identification Software                          | Skyline                                                                   |
| MS2 verified by standard                                                                                                                               | No                       | Data manipulation                                      | -                                                                         |
| Background check at MS1                                                                                                                                | No                       | Nomenclature for intact lipid molecule                 | No                                                                        |
| Background check at MS2                                                                                                                                | No                       | Nomenclature for fragment ions                         | N/A                                                                       |
| Did you presume assumptions for identification?                                                                                                        | No                       | Further identification remarks                         | -                                                                         |
| Check on:                                                                                                                                              | -                        |                                                        |                                                                           |

## 42) CAR, TG[M+NH4]<sup>+</sup> / Lipid quantification

|                            |    |                                |    |
|----------------------------|----|--------------------------------|----|
| Quantitative               | No | Batch correction               | No |
| Normalization to reference | No | Further quantification remarks | -  |

### 43) CAR, CL[M+H]<sup>+</sup> / Lipid identification

|                                                 |                    |                                                        |                                                 |
|-------------------------------------------------|--------------------|--------------------------------------------------------|-------------------------------------------------|
| Lipid class                                     | CAR, CL            | RT verified by standard                                | No                                              |
| MS Level for identification                     | MS1                | Separation of isobaric/isomeric interferece confirmed  | No                                              |
| Identification level                            | Species level      | Model for separation prediction                        | No                                              |
| Polarity mode                                   | Positive           | Additional dimension/techniques                        | IMS                                             |
| Type of positive (precursor)ion                 | [M+H] <sup>+</sup> | CCS verified by standard                               | No                                              |
| Isotope correction at MS1                       | No                 | How was/were the additional dimension(s) used?         | For separation of isobaric/isomeric interferece |
| MS1 verified by standard                        | No                 | Was a model used to predict lipid molecule separation? | No                                              |
| Background check at MS1                         | No                 | Lipid Identification Software                          | Skyline                                         |
| Did you presume assumptions for identification? | No                 | Data manipulation                                      | -                                               |
| Check on:                                       | -                  | Nomenclature for intact lipid molecule                 | No                                              |
| Limit of detection                              | No                 | Further identification remarks                         | -                                               |

### 43) CAR, CL[M+H]<sup>+</sup> / Lipid quantification

|                            |    |                                |    |
|----------------------------|----|--------------------------------|----|
| Quantitative               | No | Batch correction               | No |
| Normalization to reference | No | Further quantification remarks | -  |
